# Supplementary material for: Torsional steering as friend and foe: development of a synthetic route to the briarane diterpenoid stereotetrad
Source: Royal Society of Chemistry journal article supplement (doi:10.1039/c7ob00124j), 2017-01-01

## Torsional Steering as Friend and Foe: Development of a Synthetic Route to the Briarane Diterpenoid Stereotetrad

Nicholas G. Moon<sup>a</sup> and Andrew M. Harned<sup>a,b,\*</sup>

<sup>a</sup>*Department of Chemistry, University of Minnesota—Twin Cities, 207 Pleasant St SE, Minneapolis, Minnesota 55455, United States*

<sup>b</sup>*Department of Chemistry & Biochemistry, Texas Tech University, MS 41061, Lubbock, Texas 79409-1061, United States*

### SUPPORTING INFORMATION

|                                                                            |            |
|----------------------------------------------------------------------------|------------|
| <b>Table of contents</b>                                                   | <b>S1</b>  |
| <b>Complete reference 54</b>                                               | <b>S2</b>  |
| <b>Tabulated free energies for all calculated structures</b>               | <b>S2</b>  |
| <b>Relaxed scan experiments to locate initial guess for TS-4</b>           | <b>S3</b>  |
| <b>NBO analysis for conformers 22a and 22b</b>                             | <b>S4</b>  |
| <b>Measurement of through-space interactions in TS-1–TS-4 (Figure S4)</b>  | <b>S5</b>  |
| <b>Transition state calculations using CH<sub>3</sub>I as electrophile</b> | <b>S6</b>  |
| <b>Final coordinates and energies for all calculated structures</b>        |            |
| CH <sub>3</sub> Cl with SMD <sup>toluene</sup>                             | <b>S7</b>  |
| Conformer <b>22a</b> with SMD <sup>toluene</sup>                           | <b>S7</b>  |
| Conformer <b>22b</b> with SMD <sup>toluene</sup>                           | <b>S8</b>  |
| Transition structure <b>TS-1</b> with SMD <sup>toluene</sup>               | <b>S9</b>  |
| Transition structure <b>TS-2</b> with SMD <sup>toluene</sup>               | <b>S10</b> |
| Transition structure <b>TS-3</b> with SMD <sup>toluene</sup>               | <b>S11</b> |
| Transition structure <b>TS-4</b> with SMD <sup>toluene</sup>               | <b>S12</b> |
| <b>20<sub>AX</sub></b> with SMD <sup>THF</sup>                             | <b>S13</b> |
| <b>20<sub>EQ</sub></b> with SMD <sup>THF</sup>                             | <b>S14</b> |
| <b>20<sub>AX</sub></b> with SMD <sup>MeOH</sup>                            | <b>S15</b> |
| <b>20<sub>EQ</sub></b> with SMD <sup>MeOH</sup>                            | <b>S16</b> |
| <b>NMR spectra</b>                                                         | <b>S17</b> |

## Complete reference 54

---

M. J. Frisch, G. W. Trucks, H. B. Schlegel, G. E. Scuseria, M. A. Robb, J. R. Cheeseman, G. Scalmani, V. Barone, B. Mennucci, G. A. Petersson, H. Nakatsuji, M. Caricato, X. Li, H. P. Hratchian, A. F. Izmaylov, J. Bloino, G. Zheng, J. L. Sonnenberg, M. Hada, M. Ehara, K. Toyota, R. Fukuda, J. Hasegawa, M. Ishida, T. Nakajima, Y. Honda, O. Kitao, H. Nakai, T. Vreven, J. A. Montgomery, Jr., J. E. Peralta, F. Ogliaro, M. Bearpark, J. J. Heyd, E. Brothers, K. N. Kudin, V. N. Staroverov, T. Keith, R. Kobayashi, J. Normand, K. Raghavachari, A. Rendell, J. C. Burant, S. S. Iyengar, J. Tomasi, M. Cossi, N. Rega, J. M. Millam, M. Klene, J. E. Knox, J. B. Cross, V. Bakken, C. Adamo, J. Jaramillo, R. Gomperts, R. E. Stratmann, O. Yazyev, A. J. Austin, R. Cammi, C. Pomelli, J. W. Ochterski, R. L. Martin, K. Morokuma, V. G. Zakrzewski, G. A. Voth, P. Salvador, J. J. Dannenberg, S. Dapprich, A. D. Daniels, O. Farkas, J. B. Foresman, J. V. Ortiz, J. Cioslowski, and D. J. Fox, Gaussian, Inc., Wallingford CT, 2013.

## Tabulated free energies for all calculated structures

---

All energies are calculated for T = 298.15 K and 1 atm using SMD solvation for toluene.

| Compound                         | G <sub>calc</sub> (Hartrees) | G <sub>calc</sub> (kcal) |
|----------------------------------|------------------------------|--------------------------|
| CH <sub>3</sub> Cl               | -500.14185                   | -313843.5122             |
| Conformer <b>22A</b>             | -1365.98757                  | -857169.4941             |
| Conformer <b>22B</b>             | -1365.998106                 | -857176.1055             |
| Transition structure <b>TS-1</b> | -1866.087099                 | -1170986.449             |
| Transition structure <b>TS-2</b> | -1866.098817                 | -1170993.803             |
| Transition structure <b>TS-3</b> | -1866.096641                 | -1170992.437             |
| Transition structure <b>TS-4</b> | -1866.09753                  | -1170992.995             |

All energies are calculated for T = 298.15 K and 1 atm using SMD solvation as noted.

| Compound                                        | G <sub>calc</sub> (Hartrees) | G <sub>calc</sub> (kcal) |
|-------------------------------------------------|------------------------------|--------------------------|
| <b>20<sub>AX</sub></b> with SMD <sup>THF</sup>  | -1100.034400                 | -690281.4863             |
| <b>20<sub>EQ</sub></b> with SMD <sup>THF</sup>  | -1100.029406                 | -690278.3525             |
| <b>20<sub>AX</sub></b> with SMD <sup>MeOH</sup> | -1100.035426                 | -690282.1301             |
| <b>20<sub>EQ</sub></b> with SMD <sup>MeOH</sup> | -1100.030730                 | -690279.1834             |

## Relaxed scan experiments to locate initial guess for TS-4

The relaxed scan was performed using B3LYPD3/6-31+G(d) at T = 298.15 K and 1 atm, and with SMD solvation for toluene.

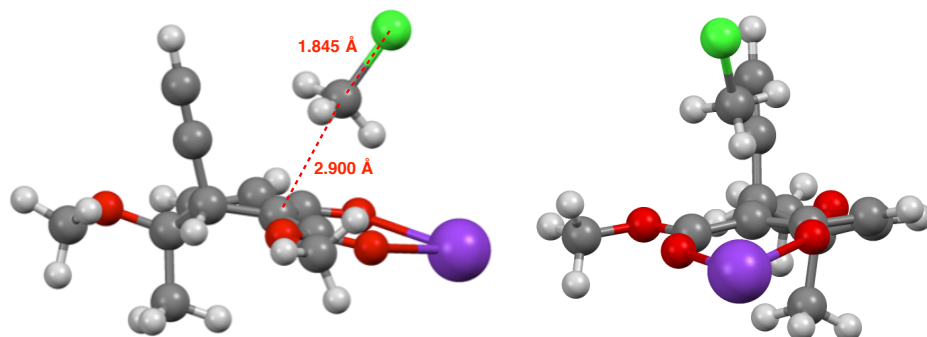

**Figure S1.** Starting structure for relaxed scan of developing C–C bond. Left: side view. Right: end view.

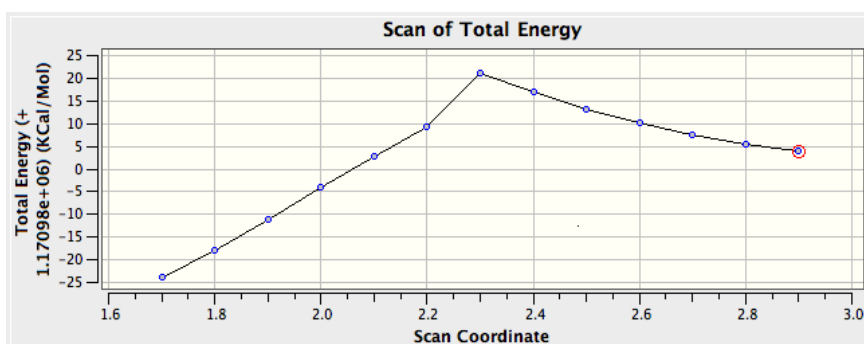

**Figure S2.** Plot of total energy as C–C bond is shortened from 2.900 Å to 1.700 Å.

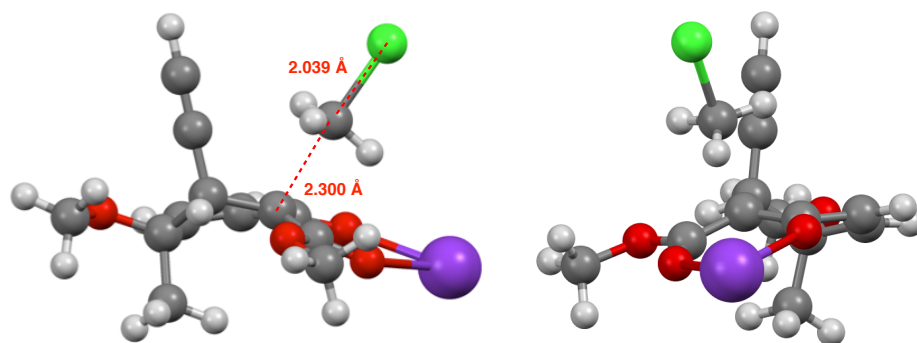

**Figure S3.** Structure with maximum energy during relaxed scan of developing C–C bond. This was used as the starting structure for the transition state optimization. Left: side view. Right: end view.

## NBO analysis for conformers 22a and 22b

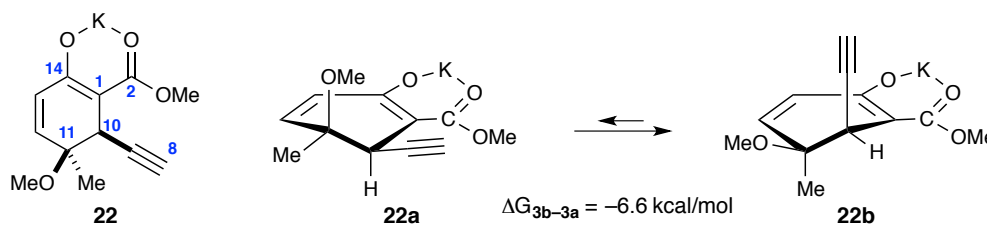

**Table S1.** Selected Donor–Acceptor Energies from Second Order Perturbation Analysis of 22a.

| Hyperconjugation from axial OMe into extended $\pi$ -system |                     |                   |
|-------------------------------------------------------------|---------------------|-------------------|
| Donor NBO                                                   | Acceptor NBO        | Energy (kcal/mol) |
| C11–OMe ( $\sigma$ )                                        | C12–C13 ( $\pi^*$ ) | 1.29              |
| C12–C13 ( $\pi$ )                                           | C14–C1 ( $\pi^*$ )  | 11.52             |
| C14–C1 ( $\pi$ )                                            | C2–O ( $\pi^*$ )    | 40.24             |
| <i>Sum</i>                                                  |                     | 53.05             |

| Hyperconjugation from extended $\pi$ -system into axial OMe |                                     |                   |
|-------------------------------------------------------------|-------------------------------------|-------------------|
| Donor NBO                                                   | Acceptor NBO                        | Energy (kcal/mol) |
| C12–C13 ( $\pi$ )                                           | C11–OCH <sub>3</sub> ( $\sigma^*$ ) | 7.35              |
| C14–C1 ( $\pi$ )                                            | C12–C13 ( $\pi^*$ )                 | 8.47              |
| C2–O ( $\pi$ )                                              | C14–C1 ( $\pi^*$ )                  | 2.10              |
| <i>Sum</i>                                                  |                                     | 17.92             |
| <i>Sum of hyperconjugation effects</i>                      |                                     | 70.97             |

| Other selected donor–acceptor pairs |                                   |      |
|-------------------------------------|-----------------------------------|------|
| C10–C9 ( $\sigma$ )                 | C8–C9 ( $\sigma^*$ )              | 9.04 |
| C1–C10 ( $\sigma$ )                 | C11–Me(equatorial) ( $\sigma^*$ ) | 1.97 |

**Table S2.** Selected Donor–Acceptor Energies from Second Order Perturbation Analysis of 22b.

| Hyperconjugation from axial Me into extended $\pi$ -system |                     |                   |
|------------------------------------------------------------|---------------------|-------------------|
| Donor NBO                                                  | Acceptor NBO        | Energy (kcal/mol) |
| C11–Me ( $\sigma$ )                                        | C12–C13 ( $\pi^*$ ) | 2.43              |
| C12–C13 ( $\pi$ )                                          | C14–C1 ( $\pi^*$ )  | 13.68             |
| C14–C1 ( $\pi$ )                                           | C2–O ( $\pi^*$ )    | 45.22             |
| <i>Sum</i>                                                 |                     | 61.33             |

| Hyperconjugation from extended $\pi$ -system into axial Me |                       |                   |
|------------------------------------------------------------|-----------------------|-------------------|
| Donor NBO                                                  | Acceptor NBO          | Energy (kcal/mol) |
| C12–C13 ( $\pi$ )                                          | C11–Me ( $\sigma^*$ ) | 2.88              |
| C14–C1 ( $\pi$ )                                           | C12–C13 ( $\pi^*$ )   | 6.90              |
| C2–O ( $\pi$ )                                             | C14–C1 ( $\pi^*$ )    | 2.36              |
| <i>Sum</i>                                                 |                       | 12.14             |
| <i>Sum of hyperconjugation effects</i>                     |                       | 73.47             |

| Other selected donor–acceptor pairs |                                    |      |
|-------------------------------------|------------------------------------|------|
| C10–C9 ( $\sigma$ )                 | C8–C9 ( $\sigma^*$ )               | 9.64 |
| C1–C10 ( $\sigma$ )                 | C11–OMe(equatorial) ( $\sigma^*$ ) | 2.97 |

### Measurement of through-space interactions in TS-1–TS-4 (Figure S4)

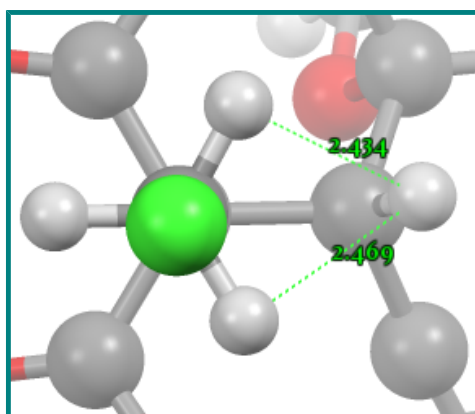

TS-1

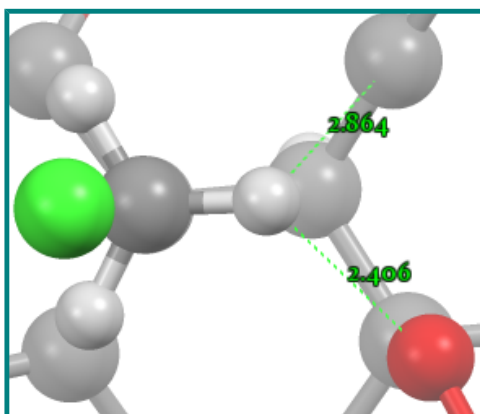

TS-2

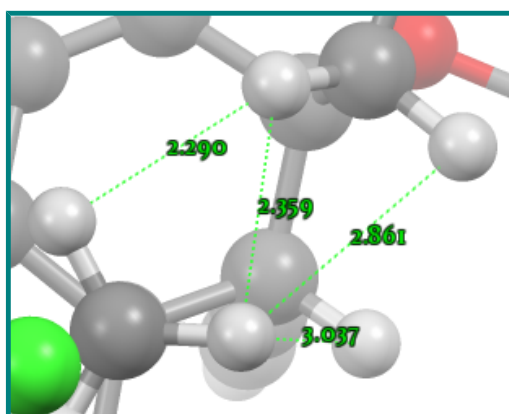

TS-3

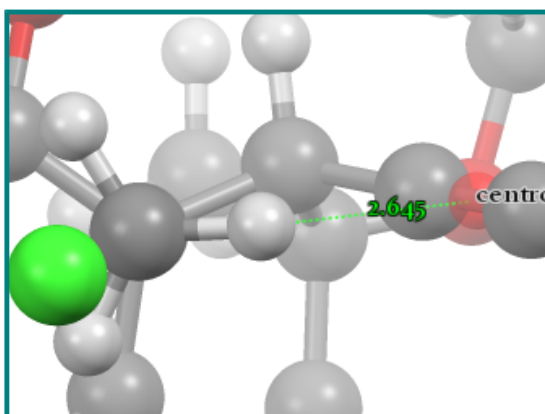

TS-4

## Transition state calculations using CH<sub>3</sub>I as electrophile

Calculations performed using B3LYPD3/6-31+G(d,p) (for C,H,O) and LANL2DZdp (for I),<sup>1</sup> SMD=Toluene.

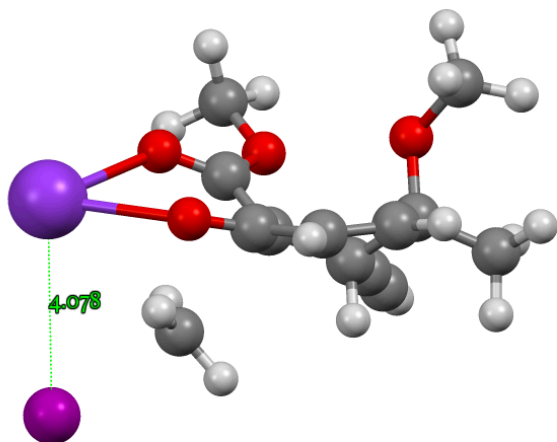

**TS-1-Mel**  
(5.2)

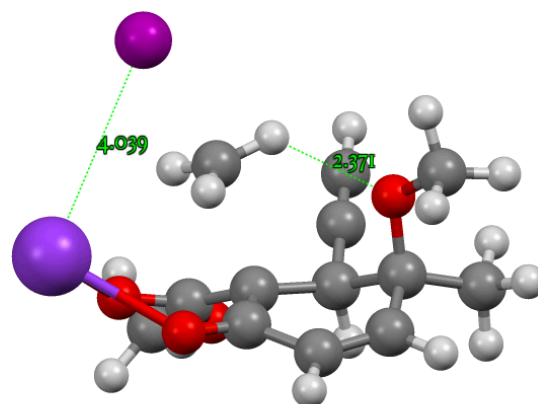

**TS-2-Mel**  
(0)

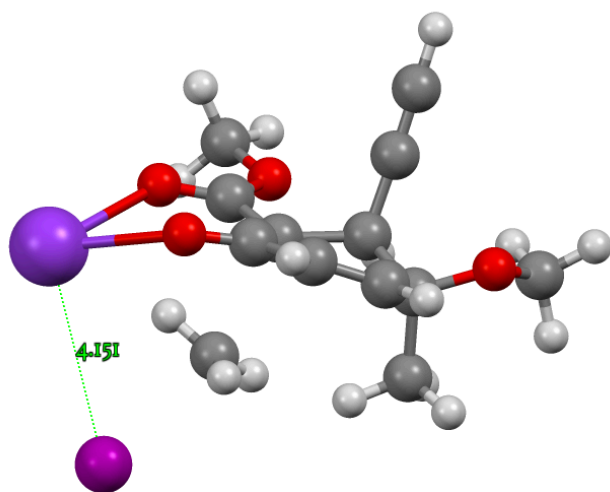

**TS-3-Mel**  
(0.9)

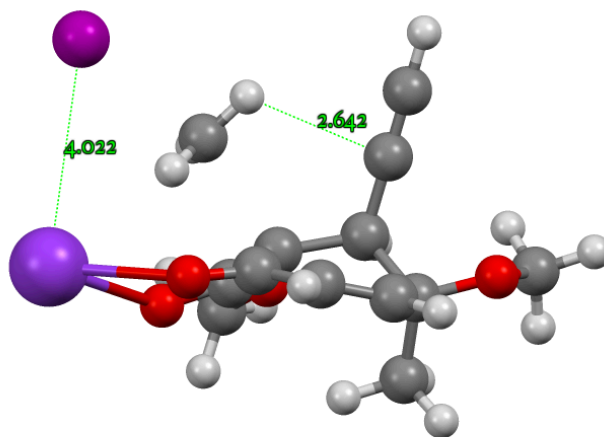

**TS-4-Mel**  
(0.3)

(1) C.E. Check, T.O. Faust, J.M. Bailey, B.J. Wright, T.M. Gilbert and L.S. Sunderlin, J. Phys. Chem. A, 105, 8111 (2001)

## Final coordinates and energies for all calculated structures

|                                                                                                                                                                                                                                                                                                                                                                                                                                                                                                                                                                                                                                                                                                                                                                                                                                                                                                                                                                                                                                                                                                                                                                                                                                                                                                                                                                                                                                                                                                                                                                                                                                                                                                                                                                                                                                                                                                                                                                                                                                                                                                                                                                                                                                                                                                                                                                   |              |                                            |              |                                         |              |                                           |              |                                              |              |           |           |           |   |          |           |           |    |           |           |           |                                                                                    |           |          |           |   |          |           |           |   |          |          |           |   |          |          |           |   |          |           |          |   |          |          |           |   |          |           |           |   |          |          |           |   |          |          |           |   |          |          |          |   |          |          |          |   |          |          |          |   |           |          |           |   |           |          |          |   |           |          |           |   |           |          |           |   |           |          |           |   |           |          |           |   |           |          |          |   |          |           |          |   |          |           |          |   |          |           |          |   |          |           |          |   |           |           |           |   |           |           |          |                                                                                      |
|-------------------------------------------------------------------------------------------------------------------------------------------------------------------------------------------------------------------------------------------------------------------------------------------------------------------------------------------------------------------------------------------------------------------------------------------------------------------------------------------------------------------------------------------------------------------------------------------------------------------------------------------------------------------------------------------------------------------------------------------------------------------------------------------------------------------------------------------------------------------------------------------------------------------------------------------------------------------------------------------------------------------------------------------------------------------------------------------------------------------------------------------------------------------------------------------------------------------------------------------------------------------------------------------------------------------------------------------------------------------------------------------------------------------------------------------------------------------------------------------------------------------------------------------------------------------------------------------------------------------------------------------------------------------------------------------------------------------------------------------------------------------------------------------------------------------------------------------------------------------------------------------------------------------------------------------------------------------------------------------------------------------------------------------------------------------------------------------------------------------------------------------------------------------------------------------------------------------------------------------------------------------------------------------------------------------------------------------------------------------|--------------|--------------------------------------------|--------------|-----------------------------------------|--------------|-------------------------------------------|--------------|----------------------------------------------|--------------|-----------|-----------|-----------|---|----------|-----------|-----------|----|-----------|-----------|-----------|------------------------------------------------------------------------------------|-----------|----------|-----------|---|----------|-----------|-----------|---|----------|----------|-----------|---|----------|----------|-----------|---|----------|-----------|----------|---|----------|----------|-----------|---|----------|-----------|-----------|---|----------|----------|-----------|---|----------|----------|-----------|---|----------|----------|----------|---|----------|----------|----------|---|----------|----------|----------|---|-----------|----------|-----------|---|-----------|----------|----------|---|-----------|----------|-----------|---|-----------|----------|-----------|---|-----------|----------|-----------|---|-----------|----------|-----------|---|-----------|----------|----------|---|----------|-----------|----------|---|----------|-----------|----------|---|----------|-----------|----------|---|----------|-----------|----------|---|-----------|-----------|-----------|---|-----------|-----------|----------|--------------------------------------------------------------------------------------|
| <p><b>CH<sub>3</sub>Cl</b> with SMD<sup>toluene</sup></p> <table border="1"> <tbody> <tr><td>C</td><td>0.000000</td><td>0.000000</td><td>-1.147000</td></tr> <tr><td>H</td><td>0.000000</td><td>1.034000</td><td>-1.488000</td></tr> <tr><td>H</td><td>-0.895000</td><td>-0.517000</td><td>-1.488000</td></tr> <tr><td>H</td><td>0.895000</td><td>-0.517000</td><td>-1.488000</td></tr> <tr><td>Cl</td><td>0.000000</td><td>0.000000</td><td>0.667000</td></tr> </tbody> </table>                                                                                                                                                                                                                                                                                                                                                                                                                                                                                                                                                                                                                                                                                                                                                                                                                                                                                                                                                                                                                                                                                                                                                                                                                                                                                                                                                                                                                                                                                                                                                                                                                                                                                                                                                                                                                                                                                 | C            | 0.000000                                   | 0.000000     | -1.147000                               | H            | 0.000000                                  | 1.034000     | -1.488000                                    | H            | -0.895000 | -0.517000 | -1.488000 | H | 0.895000 | -0.517000 | -1.488000 | Cl | 0.000000  | 0.000000  | 0.667000  | 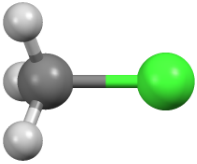 |           |          |           |   |          |           |           |   |          |          |           |   |          |          |           |   |          |           |          |   |          |          |           |   |          |           |           |   |          |          |           |   |          |          |           |   |          |          |          |   |          |          |          |   |          |          |          |   |           |          |           |   |           |          |          |   |           |          |           |   |           |          |           |   |           |          |           |   |           |          |           |   |           |          |          |   |          |           |          |   |          |           |          |   |          |           |          |   |          |           |          |   |           |           |           |   |           |           |          |                                                                                      |
| C                                                                                                                                                                                                                                                                                                                                                                                                                                                                                                                                                                                                                                                                                                                                                                                                                                                                                                                                                                                                                                                                                                                                                                                                                                                                                                                                                                                                                                                                                                                                                                                                                                                                                                                                                                                                                                                                                                                                                                                                                                                                                                                                                                                                                                                                                                                                                                 | 0.000000     | 0.000000                                   | -1.147000    |                                         |              |                                           |              |                                              |              |           |           |           |   |          |           |           |    |           |           |           |                                                                                    |           |          |           |   |          |           |           |   |          |          |           |   |          |          |           |   |          |           |          |   |          |          |           |   |          |           |           |   |          |          |           |   |          |          |           |   |          |          |          |   |          |          |          |   |          |          |          |   |           |          |           |   |           |          |          |   |           |          |           |   |           |          |           |   |           |          |           |   |           |          |           |   |           |          |          |   |          |           |          |   |          |           |          |   |          |           |          |   |          |           |          |   |           |           |           |   |           |           |          |                                                                                      |
| H                                                                                                                                                                                                                                                                                                                                                                                                                                                                                                                                                                                                                                                                                                                                                                                                                                                                                                                                                                                                                                                                                                                                                                                                                                                                                                                                                                                                                                                                                                                                                                                                                                                                                                                                                                                                                                                                                                                                                                                                                                                                                                                                                                                                                                                                                                                                                                 | 0.000000     | 1.034000                                   | -1.488000    |                                         |              |                                           |              |                                              |              |           |           |           |   |          |           |           |    |           |           |           |                                                                                    |           |          |           |   |          |           |           |   |          |          |           |   |          |          |           |   |          |           |          |   |          |          |           |   |          |           |           |   |          |          |           |   |          |          |           |   |          |          |          |   |          |          |          |   |          |          |          |   |           |          |           |   |           |          |          |   |           |          |           |   |           |          |           |   |           |          |           |   |           |          |           |   |           |          |          |   |          |           |          |   |          |           |          |   |          |           |          |   |          |           |          |   |           |           |           |   |           |           |          |                                                                                      |
| H                                                                                                                                                                                                                                                                                                                                                                                                                                                                                                                                                                                                                                                                                                                                                                                                                                                                                                                                                                                                                                                                                                                                                                                                                                                                                                                                                                                                                                                                                                                                                                                                                                                                                                                                                                                                                                                                                                                                                                                                                                                                                                                                                                                                                                                                                                                                                                 | -0.895000    | -0.517000                                  | -1.488000    |                                         |              |                                           |              |                                              |              |           |           |           |   |          |           |           |    |           |           |           |                                                                                    |           |          |           |   |          |           |           |   |          |          |           |   |          |          |           |   |          |           |          |   |          |          |           |   |          |           |           |   |          |          |           |   |          |          |           |   |          |          |          |   |          |          |          |   |          |          |          |   |           |          |           |   |           |          |          |   |           |          |           |   |           |          |           |   |           |          |           |   |           |          |           |   |           |          |          |   |          |           |          |   |          |           |          |   |          |           |          |   |          |           |          |   |           |           |           |   |           |           |          |                                                                                      |
| H                                                                                                                                                                                                                                                                                                                                                                                                                                                                                                                                                                                                                                                                                                                                                                                                                                                                                                                                                                                                                                                                                                                                                                                                                                                                                                                                                                                                                                                                                                                                                                                                                                                                                                                                                                                                                                                                                                                                                                                                                                                                                                                                                                                                                                                                                                                                                                 | 0.895000     | -0.517000                                  | -1.488000    |                                         |              |                                           |              |                                              |              |           |           |           |   |          |           |           |    |           |           |           |                                                                                    |           |          |           |   |          |           |           |   |          |          |           |   |          |          |           |   |          |           |          |   |          |          |           |   |          |           |           |   |          |          |           |   |          |          |           |   |          |          |          |   |          |          |          |   |          |          |          |   |           |          |           |   |           |          |          |   |           |          |           |   |           |          |           |   |           |          |           |   |           |          |           |   |           |          |          |   |          |           |          |   |          |           |          |   |          |           |          |   |          |           |          |   |           |           |           |   |           |           |          |                                                                                      |
| Cl                                                                                                                                                                                                                                                                                                                                                                                                                                                                                                                                                                                                                                                                                                                                                                                                                                                                                                                                                                                                                                                                                                                                                                                                                                                                                                                                                                                                                                                                                                                                                                                                                                                                                                                                                                                                                                                                                                                                                                                                                                                                                                                                                                                                                                                                                                                                                                | 0.000000     | 0.000000                                   | 0.667000     |                                         |              |                                           |              |                                              |              |           |           |           |   |          |           |           |    |           |           |           |                                                                                    |           |          |           |   |          |           |           |   |          |          |           |   |          |          |           |   |          |           |          |   |          |          |           |   |          |           |           |   |          |          |           |   |          |          |           |   |          |          |          |   |          |          |          |   |          |          |          |   |           |          |           |   |           |          |          |   |           |          |           |   |           |          |           |   |           |          |           |   |           |          |           |   |           |          |          |   |          |           |          |   |          |           |          |   |          |           |          |   |          |           |          |   |           |           |           |   |           |           |          |                                                                                      |
| <p>*** 0 imaginary frequencies ***</p> <table border="1"> <tbody> <tr><td>Sum of electronic and zero-point Energies=</td><td>-500.119199</td></tr> <tr><td>Sum of electronic and thermal Energies=</td><td>-500.116170</td></tr> <tr><td>Sum of electronic and thermal Enthalpies=</td><td>-500.115226</td></tr> <tr><td>Sum of electronic and thermal Free Energies=</td><td>-500.141850</td></tr> </tbody> </table>                                                                                                                                                                                                                                                                                                                                                                                                                                                                                                                                                                                                                                                                                                                                                                                                                                                                                                                                                                                                                                                                                                                                                                                                                                                                                                                                                                                                                                                                                                                                                                                                                                                                                                                                                                                                                                                                                                                                             |              | Sum of electronic and zero-point Energies= | -500.119199  | Sum of electronic and thermal Energies= | -500.116170  | Sum of electronic and thermal Enthalpies= | -500.115226  | Sum of electronic and thermal Free Energies= | -500.141850  |           |           |           |   |          |           |           |    |           |           |           |                                                                                    |           |          |           |   |          |           |           |   |          |          |           |   |          |          |           |   |          |           |          |   |          |          |           |   |          |           |           |   |          |          |           |   |          |          |           |   |          |          |          |   |          |          |          |   |          |          |          |   |           |          |           |   |           |          |          |   |           |          |           |   |           |          |           |   |           |          |           |   |           |          |           |   |           |          |          |   |          |           |          |   |          |           |          |   |          |           |          |   |          |           |          |   |           |           |           |   |           |           |          |                                                                                      |
| Sum of electronic and zero-point Energies=                                                                                                                                                                                                                                                                                                                                                                                                                                                                                                                                                                                                                                                                                                                                                                                                                                                                                                                                                                                                                                                                                                                                                                                                                                                                                                                                                                                                                                                                                                                                                                                                                                                                                                                                                                                                                                                                                                                                                                                                                                                                                                                                                                                                                                                                                                                        | -500.119199  |                                            |              |                                         |              |                                           |              |                                              |              |           |           |           |   |          |           |           |    |           |           |           |                                                                                    |           |          |           |   |          |           |           |   |          |          |           |   |          |          |           |   |          |           |          |   |          |          |           |   |          |           |           |   |          |          |           |   |          |          |           |   |          |          |          |   |          |          |          |   |          |          |          |   |           |          |           |   |           |          |          |   |           |          |           |   |           |          |           |   |           |          |           |   |           |          |           |   |           |          |          |   |          |           |          |   |          |           |          |   |          |           |          |   |          |           |          |   |           |           |           |   |           |           |          |                                                                                      |
| Sum of electronic and thermal Energies=                                                                                                                                                                                                                                                                                                                                                                                                                                                                                                                                                                                                                                                                                                                                                                                                                                                                                                                                                                                                                                                                                                                                                                                                                                                                                                                                                                                                                                                                                                                                                                                                                                                                                                                                                                                                                                                                                                                                                                                                                                                                                                                                                                                                                                                                                                                           | -500.116170  |                                            |              |                                         |              |                                           |              |                                              |              |           |           |           |   |          |           |           |    |           |           |           |                                                                                    |           |          |           |   |          |           |           |   |          |          |           |   |          |          |           |   |          |           |          |   |          |          |           |   |          |           |           |   |          |          |           |   |          |          |           |   |          |          |          |   |          |          |          |   |          |          |          |   |           |          |           |   |           |          |          |   |           |          |           |   |           |          |           |   |           |          |           |   |           |          |           |   |           |          |          |   |          |           |          |   |          |           |          |   |          |           |          |   |          |           |          |   |           |           |           |   |           |           |          |                                                                                      |
| Sum of electronic and thermal Enthalpies=                                                                                                                                                                                                                                                                                                                                                                                                                                                                                                                                                                                                                                                                                                                                                                                                                                                                                                                                                                                                                                                                                                                                                                                                                                                                                                                                                                                                                                                                                                                                                                                                                                                                                                                                                                                                                                                                                                                                                                                                                                                                                                                                                                                                                                                                                                                         | -500.115226  |                                            |              |                                         |              |                                           |              |                                              |              |           |           |           |   |          |           |           |    |           |           |           |                                                                                    |           |          |           |   |          |           |           |   |          |          |           |   |          |          |           |   |          |           |          |   |          |          |           |   |          |           |           |   |          |          |           |   |          |          |           |   |          |          |          |   |          |          |          |   |          |          |          |   |           |          |           |   |           |          |          |   |           |          |           |   |           |          |           |   |           |          |           |   |           |          |           |   |           |          |          |   |          |           |          |   |          |           |          |   |          |           |          |   |          |           |          |   |           |           |           |   |           |           |          |                                                                                      |
| Sum of electronic and thermal Free Energies=                                                                                                                                                                                                                                                                                                                                                                                                                                                                                                                                                                                                                                                                                                                                                                                                                                                                                                                                                                                                                                                                                                                                                                                                                                                                                                                                                                                                                                                                                                                                                                                                                                                                                                                                                                                                                                                                                                                                                                                                                                                                                                                                                                                                                                                                                                                      | -500.141850  |                                            |              |                                         |              |                                           |              |                                              |              |           |           |           |   |          |           |           |    |           |           |           |                                                                                    |           |          |           |   |          |           |           |   |          |          |           |   |          |          |           |   |          |           |          |   |          |          |           |   |          |           |           |   |          |          |           |   |          |          |           |   |          |          |          |   |          |          |          |   |          |          |          |   |           |          |           |   |           |          |          |   |           |          |           |   |           |          |           |   |           |          |           |   |           |          |           |   |           |          |          |   |          |           |          |   |          |           |          |   |          |           |          |   |          |           |          |   |           |           |           |   |           |           |          |                                                                                      |
| <p><b>Conformer 22a</b> with SMD<sup>toluene</sup></p> <table border="1"> <tbody> <tr><td>C</td><td>2.018000</td><td>-1.533000</td><td>-1.040000</td></tr> <tr><td>C</td><td>0.771000</td><td>-1.996000</td><td>-1.115000</td></tr> <tr><td>H</td><td>2.853000</td><td>-2.103000</td><td>-1.438000</td></tr> <tr><td>H</td><td>0.546000</td><td>-2.953000</td><td>-1.577000</td></tr> <tr><td>C</td><td>-0.409000</td><td>-1.272000</td><td>-0.573000</td></tr> <tr><td>C</td><td>-0.249000</td><td>0.107000</td><td>-0.321000</td></tr> <tr><td>C</td><td>2.325000</td><td>-0.249000</td><td>-0.305000</td></tr> <tr><td>C</td><td>1.138000</td><td>0.755000</td><td>-0.483000</td></tr> <tr><td>H</td><td>1.232000</td><td>1.142000</td><td>-1.508000</td></tr> <tr><td>O</td><td>2.411000</td><td>-0.496000</td><td>1.119000</td></tr> <tr><td>C</td><td>3.634000</td><td>0.368000</td><td>-0.810000</td></tr> <tr><td>H</td><td>4.464000</td><td>-0.332000</td><td>-0.689000</td></tr> <tr><td>H</td><td>3.559000</td><td>0.610000</td><td>-1.874000</td></tr> <tr><td>H</td><td>3.865000</td><td>1.279000</td><td>-0.256000</td></tr> <tr><td>C</td><td>1.358000</td><td>1.896000</td><td>0.418000</td></tr> <tr><td>H</td><td>1.777000</td><td>3.654000</td><td>1.785000</td></tr> <tr><td>C</td><td>1.588000</td><td>2.830000</td><td>1.140000</td></tr> <tr><td>C</td><td>-1.404000</td><td>0.945000</td><td>-0.193000</td></tr> <tr><td>O</td><td>-2.552000</td><td>0.625000</td><td>0.161000</td></tr> <tr><td>O</td><td>-1.164000</td><td>2.237000</td><td>-0.564000</td></tr> <tr><td>C</td><td>-2.207000</td><td>3.186000</td><td>-0.329000</td></tr> <tr><td>H</td><td>-3.091000</td><td>2.964000</td><td>-0.931000</td></tr> <tr><td>H</td><td>-1.793000</td><td>4.152000</td><td>-0.619000</td></tr> <tr><td>H</td><td>-2.489000</td><td>3.206000</td><td>0.727000</td></tr> <tr><td>C</td><td>3.230000</td><td>-1.573000</td><td>1.543000</td></tr> <tr><td>H</td><td>4.269000</td><td>-1.480000</td><td>1.198000</td></tr> <tr><td>H</td><td>3.230000</td><td>-1.542000</td><td>2.634000</td></tr> <tr><td>H</td><td>2.837000</td><td>-2.546000</td><td>1.223000</td></tr> <tr><td>O</td><td>-1.477000</td><td>-1.954000</td><td>-0.464000</td></tr> <tr><td>K</td><td>-3.672000</td><td>-1.586000</td><td>0.616000</td></tr> </tbody> </table> | C            | 2.018000                                   | -1.533000    | -1.040000                               | C            | 0.771000                                  | -1.996000    | -1.115000                                    | H            | 2.853000  | -2.103000 | -1.438000 | H | 0.546000 | -2.953000 | -1.577000 | C  | -0.409000 | -1.272000 | -0.573000 | C                                                                                  | -0.249000 | 0.107000 | -0.321000 | C | 2.325000 | -0.249000 | -0.305000 | C | 1.138000 | 0.755000 | -0.483000 | H | 1.232000 | 1.142000 | -1.508000 | O | 2.411000 | -0.496000 | 1.119000 | C | 3.634000 | 0.368000 | -0.810000 | H | 4.464000 | -0.332000 | -0.689000 | H | 3.559000 | 0.610000 | -1.874000 | H | 3.865000 | 1.279000 | -0.256000 | C | 1.358000 | 1.896000 | 0.418000 | H | 1.777000 | 3.654000 | 1.785000 | C | 1.588000 | 2.830000 | 1.140000 | C | -1.404000 | 0.945000 | -0.193000 | O | -2.552000 | 0.625000 | 0.161000 | O | -1.164000 | 2.237000 | -0.564000 | C | -2.207000 | 3.186000 | -0.329000 | H | -3.091000 | 2.964000 | -0.931000 | H | -1.793000 | 4.152000 | -0.619000 | H | -2.489000 | 3.206000 | 0.727000 | C | 3.230000 | -1.573000 | 1.543000 | H | 4.269000 | -1.480000 | 1.198000 | H | 3.230000 | -1.542000 | 2.634000 | H | 2.837000 | -2.546000 | 1.223000 | O | -1.477000 | -1.954000 | -0.464000 | K | -3.672000 | -1.586000 | 0.616000 |  |
| C                                                                                                                                                                                                                                                                                                                                                                                                                                                                                                                                                                                                                                                                                                                                                                                                                                                                                                                                                                                                                                                                                                                                                                                                                                                                                                                                                                                                                                                                                                                                                                                                                                                                                                                                                                                                                                                                                                                                                                                                                                                                                                                                                                                                                                                                                                                                                                 | 2.018000     | -1.533000                                  | -1.040000    |                                         |              |                                           |              |                                              |              |           |           |           |   |          |           |           |    |           |           |           |                                                                                    |           |          |           |   |          |           |           |   |          |          |           |   |          |          |           |   |          |           |          |   |          |          |           |   |          |           |           |   |          |          |           |   |          |          |           |   |          |          |          |   |          |          |          |   |          |          |          |   |           |          |           |   |           |          |          |   |           |          |           |   |           |          |           |   |           |          |           |   |           |          |           |   |           |          |          |   |          |           |          |   |          |           |          |   |          |           |          |   |          |           |          |   |           |           |           |   |           |           |          |                                                                                      |
| C                                                                                                                                                                                                                                                                                                                                                                                                                                                                                                                                                                                                                                                                                                                                                                                                                                                                                                                                                                                                                                                                                                                                                                                                                                                                                                                                                                                                                                                                                                                                                                                                                                                                                                                                                                                                                                                                                                                                                                                                                                                                                                                                                                                                                                                                                                                                                                 | 0.771000     | -1.996000                                  | -1.115000    |                                         |              |                                           |              |                                              |              |           |           |           |   |          |           |           |    |           |           |           |                                                                                    |           |          |           |   |          |           |           |   |          |          |           |   |          |          |           |   |          |           |          |   |          |          |           |   |          |           |           |   |          |          |           |   |          |          |           |   |          |          |          |   |          |          |          |   |          |          |          |   |           |          |           |   |           |          |          |   |           |          |           |   |           |          |           |   |           |          |           |   |           |          |           |   |           |          |          |   |          |           |          |   |          |           |          |   |          |           |          |   |          |           |          |   |           |           |           |   |           |           |          |                                                                                      |
| H                                                                                                                                                                                                                                                                                                                                                                                                                                                                                                                                                                                                                                                                                                                                                                                                                                                                                                                                                                                                                                                                                                                                                                                                                                                                                                                                                                                                                                                                                                                                                                                                                                                                                                                                                                                                                                                                                                                                                                                                                                                                                                                                                                                                                                                                                                                                                                 | 2.853000     | -2.103000                                  | -1.438000    |                                         |              |                                           |              |                                              |              |           |           |           |   |          |           |           |    |           |           |           |                                                                                    |           |          |           |   |          |           |           |   |          |          |           |   |          |          |           |   |          |           |          |   |          |          |           |   |          |           |           |   |          |          |           |   |          |          |           |   |          |          |          |   |          |          |          |   |          |          |          |   |           |          |           |   |           |          |          |   |           |          |           |   |           |          |           |   |           |          |           |   |           |          |           |   |           |          |          |   |          |           |          |   |          |           |          |   |          |           |          |   |          |           |          |   |           |           |           |   |           |           |          |                                                                                      |
| H                                                                                                                                                                                                                                                                                                                                                                                                                                                                                                                                                                                                                                                                                                                                                                                                                                                                                                                                                                                                                                                                                                                                                                                                                                                                                                                                                                                                                                                                                                                                                                                                                                                                                                                                                                                                                                                                                                                                                                                                                                                                                                                                                                                                                                                                                                                                                                 | 0.546000     | -2.953000                                  | -1.577000    |                                         |              |                                           |              |                                              |              |           |           |           |   |          |           |           |    |           |           |           |                                                                                    |           |          |           |   |          |           |           |   |          |          |           |   |          |          |           |   |          |           |          |   |          |          |           |   |          |           |           |   |          |          |           |   |          |          |           |   |          |          |          |   |          |          |          |   |          |          |          |   |           |          |           |   |           |          |          |   |           |          |           |   |           |          |           |   |           |          |           |   |           |          |           |   |           |          |          |   |          |           |          |   |          |           |          |   |          |           |          |   |          |           |          |   |           |           |           |   |           |           |          |                                                                                      |
| C                                                                                                                                                                                                                                                                                                                                                                                                                                                                                                                                                                                                                                                                                                                                                                                                                                                                                                                                                                                                                                                                                                                                                                                                                                                                                                                                                                                                                                                                                                                                                                                                                                                                                                                                                                                                                                                                                                                                                                                                                                                                                                                                                                                                                                                                                                                                                                 | -0.409000    | -1.272000                                  | -0.573000    |                                         |              |                                           |              |                                              |              |           |           |           |   |          |           |           |    |           |           |           |                                                                                    |           |          |           |   |          |           |           |   |          |          |           |   |          |          |           |   |          |           |          |   |          |          |           |   |          |           |           |   |          |          |           |   |          |          |           |   |          |          |          |   |          |          |          |   |          |          |          |   |           |          |           |   |           |          |          |   |           |          |           |   |           |          |           |   |           |          |           |   |           |          |           |   |           |          |          |   |          |           |          |   |          |           |          |   |          |           |          |   |          |           |          |   |           |           |           |   |           |           |          |                                                                                      |
| C                                                                                                                                                                                                                                                                                                                                                                                                                                                                                                                                                                                                                                                                                                                                                                                                                                                                                                                                                                                                                                                                                                                                                                                                                                                                                                                                                                                                                                                                                                                                                                                                                                                                                                                                                                                                                                                                                                                                                                                                                                                                                                                                                                                                                                                                                                                                                                 | -0.249000    | 0.107000                                   | -0.321000    |                                         |              |                                           |              |                                              |              |           |           |           |   |          |           |           |    |           |           |           |                                                                                    |           |          |           |   |          |           |           |   |          |          |           |   |          |          |           |   |          |           |          |   |          |          |           |   |          |           |           |   |          |          |           |   |          |          |           |   |          |          |          |   |          |          |          |   |          |          |          |   |           |          |           |   |           |          |          |   |           |          |           |   |           |          |           |   |           |          |           |   |           |          |           |   |           |          |          |   |          |           |          |   |          |           |          |   |          |           |          |   |          |           |          |   |           |           |           |   |           |           |          |                                                                                      |
| C                                                                                                                                                                                                                                                                                                                                                                                                                                                                                                                                                                                                                                                                                                                                                                                                                                                                                                                                                                                                                                                                                                                                                                                                                                                                                                                                                                                                                                                                                                                                                                                                                                                                                                                                                                                                                                                                                                                                                                                                                                                                                                                                                                                                                                                                                                                                                                 | 2.325000     | -0.249000                                  | -0.305000    |                                         |              |                                           |              |                                              |              |           |           |           |   |          |           |           |    |           |           |           |                                                                                    |           |          |           |   |          |           |           |   |          |          |           |   |          |          |           |   |          |           |          |   |          |          |           |   |          |           |           |   |          |          |           |   |          |          |           |   |          |          |          |   |          |          |          |   |          |          |          |   |           |          |           |   |           |          |          |   |           |          |           |   |           |          |           |   |           |          |           |   |           |          |           |   |           |          |          |   |          |           |          |   |          |           |          |   |          |           |          |   |          |           |          |   |           |           |           |   |           |           |          |                                                                                      |
| C                                                                                                                                                                                                                                                                                                                                                                                                                                                                                                                                                                                                                                                                                                                                                                                                                                                                                                                                                                                                                                                                                                                                                                                                                                                                                                                                                                                                                                                                                                                                                                                                                                                                                                                                                                                                                                                                                                                                                                                                                                                                                                                                                                                                                                                                                                                                                                 | 1.138000     | 0.755000                                   | -0.483000    |                                         |              |                                           |              |                                              |              |           |           |           |   |          |           |           |    |           |           |           |                                                                                    |           |          |           |   |          |           |           |   |          |          |           |   |          |          |           |   |          |           |          |   |          |          |           |   |          |           |           |   |          |          |           |   |          |          |           |   |          |          |          |   |          |          |          |   |          |          |          |   |           |          |           |   |           |          |          |   |           |          |           |   |           |          |           |   |           |          |           |   |           |          |           |   |           |          |          |   |          |           |          |   |          |           |          |   |          |           |          |   |          |           |          |   |           |           |           |   |           |           |          |                                                                                      |
| H                                                                                                                                                                                                                                                                                                                                                                                                                                                                                                                                                                                                                                                                                                                                                                                                                                                                                                                                                                                                                                                                                                                                                                                                                                                                                                                                                                                                                                                                                                                                                                                                                                                                                                                                                                                                                                                                                                                                                                                                                                                                                                                                                                                                                                                                                                                                                                 | 1.232000     | 1.142000                                   | -1.508000    |                                         |              |                                           |              |                                              |              |           |           |           |   |          |           |           |    |           |           |           |                                                                                    |           |          |           |   |          |           |           |   |          |          |           |   |          |          |           |   |          |           |          |   |          |          |           |   |          |           |           |   |          |          |           |   |          |          |           |   |          |          |          |   |          |          |          |   |          |          |          |   |           |          |           |   |           |          |          |   |           |          |           |   |           |          |           |   |           |          |           |   |           |          |           |   |           |          |          |   |          |           |          |   |          |           |          |   |          |           |          |   |          |           |          |   |           |           |           |   |           |           |          |                                                                                      |
| O                                                                                                                                                                                                                                                                                                                                                                                                                                                                                                                                                                                                                                                                                                                                                                                                                                                                                                                                                                                                                                                                                                                                                                                                                                                                                                                                                                                                                                                                                                                                                                                                                                                                                                                                                                                                                                                                                                                                                                                                                                                                                                                                                                                                                                                                                                                                                                 | 2.411000     | -0.496000                                  | 1.119000     |                                         |              |                                           |              |                                              |              |           |           |           |   |          |           |           |    |           |           |           |                                                                                    |           |          |           |   |          |           |           |   |          |          |           |   |          |          |           |   |          |           |          |   |          |          |           |   |          |           |           |   |          |          |           |   |          |          |           |   |          |          |          |   |          |          |          |   |          |          |          |   |           |          |           |   |           |          |          |   |           |          |           |   |           |          |           |   |           |          |           |   |           |          |           |   |           |          |          |   |          |           |          |   |          |           |          |   |          |           |          |   |          |           |          |   |           |           |           |   |           |           |          |                                                                                      |
| C                                                                                                                                                                                                                                                                                                                                                                                                                                                                                                                                                                                                                                                                                                                                                                                                                                                                                                                                                                                                                                                                                                                                                                                                                                                                                                                                                                                                                                                                                                                                                                                                                                                                                                                                                                                                                                                                                                                                                                                                                                                                                                                                                                                                                                                                                                                                                                 | 3.634000     | 0.368000                                   | -0.810000    |                                         |              |                                           |              |                                              |              |           |           |           |   |          |           |           |    |           |           |           |                                                                                    |           |          |           |   |          |           |           |   |          |          |           |   |          |          |           |   |          |           |          |   |          |          |           |   |          |           |           |   |          |          |           |   |          |          |           |   |          |          |          |   |          |          |          |   |          |          |          |   |           |          |           |   |           |          |          |   |           |          |           |   |           |          |           |   |           |          |           |   |           |          |           |   |           |          |          |   |          |           |          |   |          |           |          |   |          |           |          |   |          |           |          |   |           |           |           |   |           |           |          |                                                                                      |
| H                                                                                                                                                                                                                                                                                                                                                                                                                                                                                                                                                                                                                                                                                                                                                                                                                                                                                                                                                                                                                                                                                                                                                                                                                                                                                                                                                                                                                                                                                                                                                                                                                                                                                                                                                                                                                                                                                                                                                                                                                                                                                                                                                                                                                                                                                                                                                                 | 4.464000     | -0.332000                                  | -0.689000    |                                         |              |                                           |              |                                              |              |           |           |           |   |          |           |           |    |           |           |           |                                                                                    |           |          |           |   |          |           |           |   |          |          |           |   |          |          |           |   |          |           |          |   |          |          |           |   |          |           |           |   |          |          |           |   |          |          |           |   |          |          |          |   |          |          |          |   |          |          |          |   |           |          |           |   |           |          |          |   |           |          |           |   |           |          |           |   |           |          |           |   |           |          |           |   |           |          |          |   |          |           |          |   |          |           |          |   |          |           |          |   |          |           |          |   |           |           |           |   |           |           |          |                                                                                      |
| H                                                                                                                                                                                                                                                                                                                                                                                                                                                                                                                                                                                                                                                                                                                                                                                                                                                                                                                                                                                                                                                                                                                                                                                                                                                                                                                                                                                                                                                                                                                                                                                                                                                                                                                                                                                                                                                                                                                                                                                                                                                                                                                                                                                                                                                                                                                                                                 | 3.559000     | 0.610000                                   | -1.874000    |                                         |              |                                           |              |                                              |              |           |           |           |   |          |           |           |    |           |           |           |                                                                                    |           |          |           |   |          |           |           |   |          |          |           |   |          |          |           |   |          |           |          |   |          |          |           |   |          |           |           |   |          |          |           |   |          |          |           |   |          |          |          |   |          |          |          |   |          |          |          |   |           |          |           |   |           |          |          |   |           |          |           |   |           |          |           |   |           |          |           |   |           |          |           |   |           |          |          |   |          |           |          |   |          |           |          |   |          |           |          |   |          |           |          |   |           |           |           |   |           |           |          |                                                                                      |
| H                                                                                                                                                                                                                                                                                                                                                                                                                                                                                                                                                                                                                                                                                                                                                                                                                                                                                                                                                                                                                                                                                                                                                                                                                                                                                                                                                                                                                                                                                                                                                                                                                                                                                                                                                                                                                                                                                                                                                                                                                                                                                                                                                                                                                                                                                                                                                                 | 3.865000     | 1.279000                                   | -0.256000    |                                         |              |                                           |              |                                              |              |           |           |           |   |          |           |           |    |           |           |           |                                                                                    |           |          |           |   |          |           |           |   |          |          |           |   |          |          |           |   |          |           |          |   |          |          |           |   |          |           |           |   |          |          |           |   |          |          |           |   |          |          |          |   |          |          |          |   |          |          |          |   |           |          |           |   |           |          |          |   |           |          |           |   |           |          |           |   |           |          |           |   |           |          |           |   |           |          |          |   |          |           |          |   |          |           |          |   |          |           |          |   |          |           |          |   |           |           |           |   |           |           |          |                                                                                      |
| C                                                                                                                                                                                                                                                                                                                                                                                                                                                                                                                                                                                                                                                                                                                                                                                                                                                                                                                                                                                                                                                                                                                                                                                                                                                                                                                                                                                                                                                                                                                                                                                                                                                                                                                                                                                                                                                                                                                                                                                                                                                                                                                                                                                                                                                                                                                                                                 | 1.358000     | 1.896000                                   | 0.418000     |                                         |              |                                           |              |                                              |              |           |           |           |   |          |           |           |    |           |           |           |                                                                                    |           |          |           |   |          |           |           |   |          |          |           |   |          |          |           |   |          |           |          |   |          |          |           |   |          |           |           |   |          |          |           |   |          |          |           |   |          |          |          |   |          |          |          |   |          |          |          |   |           |          |           |   |           |          |          |   |           |          |           |   |           |          |           |   |           |          |           |   |           |          |           |   |           |          |          |   |          |           |          |   |          |           |          |   |          |           |          |   |          |           |          |   |           |           |           |   |           |           |          |                                                                                      |
| H                                                                                                                                                                                                                                                                                                                                                                                                                                                                                                                                                                                                                                                                                                                                                                                                                                                                                                                                                                                                                                                                                                                                                                                                                                                                                                                                                                                                                                                                                                                                                                                                                                                                                                                                                                                                                                                                                                                                                                                                                                                                                                                                                                                                                                                                                                                                                                 | 1.777000     | 3.654000                                   | 1.785000     |                                         |              |                                           |              |                                              |              |           |           |           |   |          |           |           |    |           |           |           |                                                                                    |           |          |           |   |          |           |           |   |          |          |           |   |          |          |           |   |          |           |          |   |          |          |           |   |          |           |           |   |          |          |           |   |          |          |           |   |          |          |          |   |          |          |          |   |          |          |          |   |           |          |           |   |           |          |          |   |           |          |           |   |           |          |           |   |           |          |           |   |           |          |           |   |           |          |          |   |          |           |          |   |          |           |          |   |          |           |          |   |          |           |          |   |           |           |           |   |           |           |          |                                                                                      |
| C                                                                                                                                                                                                                                                                                                                                                                                                                                                                                                                                                                                                                                                                                                                                                                                                                                                                                                                                                                                                                                                                                                                                                                                                                                                                                                                                                                                                                                                                                                                                                                                                                                                                                                                                                                                                                                                                                                                                                                                                                                                                                                                                                                                                                                                                                                                                                                 | 1.588000     | 2.830000                                   | 1.140000     |                                         |              |                                           |              |                                              |              |           |           |           |   |          |           |           |    |           |           |           |                                                                                    |           |          |           |   |          |           |           |   |          |          |           |   |          |          |           |   |          |           |          |   |          |          |           |   |          |           |           |   |          |          |           |   |          |          |           |   |          |          |          |   |          |          |          |   |          |          |          |   |           |          |           |   |           |          |          |   |           |          |           |   |           |          |           |   |           |          |           |   |           |          |           |   |           |          |          |   |          |           |          |   |          |           |          |   |          |           |          |   |          |           |          |   |           |           |           |   |           |           |          |                                                                                      |
| C                                                                                                                                                                                                                                                                                                                                                                                                                                                                                                                                                                                                                                                                                                                                                                                                                                                                                                                                                                                                                                                                                                                                                                                                                                                                                                                                                                                                                                                                                                                                                                                                                                                                                                                                                                                                                                                                                                                                                                                                                                                                                                                                                                                                                                                                                                                                                                 | -1.404000    | 0.945000                                   | -0.193000    |                                         |              |                                           |              |                                              |              |           |           |           |   |          |           |           |    |           |           |           |                                                                                    |           |          |           |   |          |           |           |   |          |          |           |   |          |          |           |   |          |           |          |   |          |          |           |   |          |           |           |   |          |          |           |   |          |          |           |   |          |          |          |   |          |          |          |   |          |          |          |   |           |          |           |   |           |          |          |   |           |          |           |   |           |          |           |   |           |          |           |   |           |          |           |   |           |          |          |   |          |           |          |   |          |           |          |   |          |           |          |   |          |           |          |   |           |           |           |   |           |           |          |                                                                                      |
| O                                                                                                                                                                                                                                                                                                                                                                                                                                                                                                                                                                                                                                                                                                                                                                                                                                                                                                                                                                                                                                                                                                                                                                                                                                                                                                                                                                                                                                                                                                                                                                                                                                                                                                                                                                                                                                                                                                                                                                                                                                                                                                                                                                                                                                                                                                                                                                 | -2.552000    | 0.625000                                   | 0.161000     |                                         |              |                                           |              |                                              |              |           |           |           |   |          |           |           |    |           |           |           |                                                                                    |           |          |           |   |          |           |           |   |          |          |           |   |          |          |           |   |          |           |          |   |          |          |           |   |          |           |           |   |          |          |           |   |          |          |           |   |          |          |          |   |          |          |          |   |          |          |          |   |           |          |           |   |           |          |          |   |           |          |           |   |           |          |           |   |           |          |           |   |           |          |           |   |           |          |          |   |          |           |          |   |          |           |          |   |          |           |          |   |          |           |          |   |           |           |           |   |           |           |          |                                                                                      |
| O                                                                                                                                                                                                                                                                                                                                                                                                                                                                                                                                                                                                                                                                                                                                                                                                                                                                                                                                                                                                                                                                                                                                                                                                                                                                                                                                                                                                                                                                                                                                                                                                                                                                                                                                                                                                                                                                                                                                                                                                                                                                                                                                                                                                                                                                                                                                                                 | -1.164000    | 2.237000                                   | -0.564000    |                                         |              |                                           |              |                                              |              |           |           |           |   |          |           |           |    |           |           |           |                                                                                    |           |          |           |   |          |           |           |   |          |          |           |   |          |          |           |   |          |           |          |   |          |          |           |   |          |           |           |   |          |          |           |   |          |          |           |   |          |          |          |   |          |          |          |   |          |          |          |   |           |          |           |   |           |          |          |   |           |          |           |   |           |          |           |   |           |          |           |   |           |          |           |   |           |          |          |   |          |           |          |   |          |           |          |   |          |           |          |   |          |           |          |   |           |           |           |   |           |           |          |                                                                                      |
| C                                                                                                                                                                                                                                                                                                                                                                                                                                                                                                                                                                                                                                                                                                                                                                                                                                                                                                                                                                                                                                                                                                                                                                                                                                                                                                                                                                                                                                                                                                                                                                                                                                                                                                                                                                                                                                                                                                                                                                                                                                                                                                                                                                                                                                                                                                                                                                 | -2.207000    | 3.186000                                   | -0.329000    |                                         |              |                                           |              |                                              |              |           |           |           |   |          |           |           |    |           |           |           |                                                                                    |           |          |           |   |          |           |           |   |          |          |           |   |          |          |           |   |          |           |          |   |          |          |           |   |          |           |           |   |          |          |           |   |          |          |           |   |          |          |          |   |          |          |          |   |          |          |          |   |           |          |           |   |           |          |          |   |           |          |           |   |           |          |           |   |           |          |           |   |           |          |           |   |           |          |          |   |          |           |          |   |          |           |          |   |          |           |          |   |          |           |          |   |           |           |           |   |           |           |          |                                                                                      |
| H                                                                                                                                                                                                                                                                                                                                                                                                                                                                                                                                                                                                                                                                                                                                                                                                                                                                                                                                                                                                                                                                                                                                                                                                                                                                                                                                                                                                                                                                                                                                                                                                                                                                                                                                                                                                                                                                                                                                                                                                                                                                                                                                                                                                                                                                                                                                                                 | -3.091000    | 2.964000                                   | -0.931000    |                                         |              |                                           |              |                                              |              |           |           |           |   |          |           |           |    |           |           |           |                                                                                    |           |          |           |   |          |           |           |   |          |          |           |   |          |          |           |   |          |           |          |   |          |          |           |   |          |           |           |   |          |          |           |   |          |          |           |   |          |          |          |   |          |          |          |   |          |          |          |   |           |          |           |   |           |          |          |   |           |          |           |   |           |          |           |   |           |          |           |   |           |          |           |   |           |          |          |   |          |           |          |   |          |           |          |   |          |           |          |   |          |           |          |   |           |           |           |   |           |           |          |                                                                                      |
| H                                                                                                                                                                                                                                                                                                                                                                                                                                                                                                                                                                                                                                                                                                                                                                                                                                                                                                                                                                                                                                                                                                                                                                                                                                                                                                                                                                                                                                                                                                                                                                                                                                                                                                                                                                                                                                                                                                                                                                                                                                                                                                                                                                                                                                                                                                                                                                 | -1.793000    | 4.152000                                   | -0.619000    |                                         |              |                                           |              |                                              |              |           |           |           |   |          |           |           |    |           |           |           |                                                                                    |           |          |           |   |          |           |           |   |          |          |           |   |          |          |           |   |          |           |          |   |          |          |           |   |          |           |           |   |          |          |           |   |          |          |           |   |          |          |          |   |          |          |          |   |          |          |          |   |           |          |           |   |           |          |          |   |           |          |           |   |           |          |           |   |           |          |           |   |           |          |           |   |           |          |          |   |          |           |          |   |          |           |          |   |          |           |          |   |          |           |          |   |           |           |           |   |           |           |          |                                                                                      |
| H                                                                                                                                                                                                                                                                                                                                                                                                                                                                                                                                                                                                                                                                                                                                                                                                                                                                                                                                                                                                                                                                                                                                                                                                                                                                                                                                                                                                                                                                                                                                                                                                                                                                                                                                                                                                                                                                                                                                                                                                                                                                                                                                                                                                                                                                                                                                                                 | -2.489000    | 3.206000                                   | 0.727000     |                                         |              |                                           |              |                                              |              |           |           |           |   |          |           |           |    |           |           |           |                                                                                    |           |          |           |   |          |           |           |   |          |          |           |   |          |          |           |   |          |           |          |   |          |          |           |   |          |           |           |   |          |          |           |   |          |          |           |   |          |          |          |   |          |          |          |   |          |          |          |   |           |          |           |   |           |          |          |   |           |          |           |   |           |          |           |   |           |          |           |   |           |          |           |   |           |          |          |   |          |           |          |   |          |           |          |   |          |           |          |   |          |           |          |   |           |           |           |   |           |           |          |                                                                                      |
| C                                                                                                                                                                                                                                                                                                                                                                                                                                                                                                                                                                                                                                                                                                                                                                                                                                                                                                                                                                                                                                                                                                                                                                                                                                                                                                                                                                                                                                                                                                                                                                                                                                                                                                                                                                                                                                                                                                                                                                                                                                                                                                                                                                                                                                                                                                                                                                 | 3.230000     | -1.573000                                  | 1.543000     |                                         |              |                                           |              |                                              |              |           |           |           |   |          |           |           |    |           |           |           |                                                                                    |           |          |           |   |          |           |           |   |          |          |           |   |          |          |           |   |          |           |          |   |          |          |           |   |          |           |           |   |          |          |           |   |          |          |           |   |          |          |          |   |          |          |          |   |          |          |          |   |           |          |           |   |           |          |          |   |           |          |           |   |           |          |           |   |           |          |           |   |           |          |           |   |           |          |          |   |          |           |          |   |          |           |          |   |          |           |          |   |          |           |          |   |           |           |           |   |           |           |          |                                                                                      |
| H                                                                                                                                                                                                                                                                                                                                                                                                                                                                                                                                                                                                                                                                                                                                                                                                                                                                                                                                                                                                                                                                                                                                                                                                                                                                                                                                                                                                                                                                                                                                                                                                                                                                                                                                                                                                                                                                                                                                                                                                                                                                                                                                                                                                                                                                                                                                                                 | 4.269000     | -1.480000                                  | 1.198000     |                                         |              |                                           |              |                                              |              |           |           |           |   |          |           |           |    |           |           |           |                                                                                    |           |          |           |   |          |           |           |   |          |          |           |   |          |          |           |   |          |           |          |   |          |          |           |   |          |           |           |   |          |          |           |   |          |          |           |   |          |          |          |   |          |          |          |   |          |          |          |   |           |          |           |   |           |          |          |   |           |          |           |   |           |          |           |   |           |          |           |   |           |          |           |   |           |          |          |   |          |           |          |   |          |           |          |   |          |           |          |   |          |           |          |   |           |           |           |   |           |           |          |                                                                                      |
| H                                                                                                                                                                                                                                                                                                                                                                                                                                                                                                                                                                                                                                                                                                                                                                                                                                                                                                                                                                                                                                                                                                                                                                                                                                                                                                                                                                                                                                                                                                                                                                                                                                                                                                                                                                                                                                                                                                                                                                                                                                                                                                                                                                                                                                                                                                                                                                 | 3.230000     | -1.542000                                  | 2.634000     |                                         |              |                                           |              |                                              |              |           |           |           |   |          |           |           |    |           |           |           |                                                                                    |           |          |           |   |          |           |           |   |          |          |           |   |          |          |           |   |          |           |          |   |          |          |           |   |          |           |           |   |          |          |           |   |          |          |           |   |          |          |          |   |          |          |          |   |          |          |          |   |           |          |           |   |           |          |          |   |           |          |           |   |           |          |           |   |           |          |           |   |           |          |           |   |           |          |          |   |          |           |          |   |          |           |          |   |          |           |          |   |          |           |          |   |           |           |           |   |           |           |          |                                                                                      |
| H                                                                                                                                                                                                                                                                                                                                                                                                                                                                                                                                                                                                                                                                                                                                                                                                                                                                                                                                                                                                                                                                                                                                                                                                                                                                                                                                                                                                                                                                                                                                                                                                                                                                                                                                                                                                                                                                                                                                                                                                                                                                                                                                                                                                                                                                                                                                                                 | 2.837000     | -2.546000                                  | 1.223000     |                                         |              |                                           |              |                                              |              |           |           |           |   |          |           |           |    |           |           |           |                                                                                    |           |          |           |   |          |           |           |   |          |          |           |   |          |          |           |   |          |           |          |   |          |          |           |   |          |           |           |   |          |          |           |   |          |          |           |   |          |          |          |   |          |          |          |   |          |          |          |   |           |          |           |   |           |          |          |   |           |          |           |   |           |          |           |   |           |          |           |   |           |          |           |   |           |          |          |   |          |           |          |   |          |           |          |   |          |           |          |   |          |           |          |   |           |           |           |   |           |           |          |                                                                                      |
| O                                                                                                                                                                                                                                                                                                                                                                                                                                                                                                                                                                                                                                                                                                                                                                                                                                                                                                                                                                                                                                                                                                                                                                                                                                                                                                                                                                                                                                                                                                                                                                                                                                                                                                                                                                                                                                                                                                                                                                                                                                                                                                                                                                                                                                                                                                                                                                 | -1.477000    | -1.954000                                  | -0.464000    |                                         |              |                                           |              |                                              |              |           |           |           |   |          |           |           |    |           |           |           |                                                                                    |           |          |           |   |          |           |           |   |          |          |           |   |          |          |           |   |          |           |          |   |          |          |           |   |          |           |           |   |          |          |           |   |          |          |           |   |          |          |          |   |          |          |          |   |          |          |          |   |           |          |           |   |           |          |          |   |           |          |           |   |           |          |           |   |           |          |           |   |           |          |           |   |           |          |          |   |          |           |          |   |          |           |          |   |          |           |          |   |          |           |          |   |           |           |           |   |           |           |          |                                                                                      |
| K                                                                                                                                                                                                                                                                                                                                                                                                                                                                                                                                                                                                                                                                                                                                                                                                                                                                                                                                                                                                                                                                                                                                                                                                                                                                                                                                                                                                                                                                                                                                                                                                                                                                                                                                                                                                                                                                                                                                                                                                                                                                                                                                                                                                                                                                                                                                                                 | -3.672000    | -1.586000                                  | 0.616000     |                                         |              |                                           |              |                                              |              |           |           |           |   |          |           |           |    |           |           |           |                                                                                    |           |          |           |   |          |           |           |   |          |          |           |   |          |          |           |   |          |           |          |   |          |          |           |   |          |           |           |   |          |          |           |   |          |          |           |   |          |          |          |   |          |          |          |   |          |          |          |   |           |          |           |   |           |          |          |   |           |          |           |   |           |          |           |   |           |          |           |   |           |          |           |   |           |          |          |   |          |           |          |   |          |           |          |   |          |           |          |   |          |           |          |   |           |           |           |   |           |           |          |                                                                                      |
| <p>*** 0 imaginary frequencies ***</p> <table border="1"> <tbody> <tr><td>Sum of electronic and zero-point Energies=</td><td>-1365.940828</td></tr> <tr><td>Sum of electronic and thermal Energies=</td><td>-1365.922498</td></tr> <tr><td>Sum of electronic and thermal Enthalpies=</td><td>-1365.921554</td></tr> <tr><td>Sum of electronic and thermal Free Energies=</td><td>-1365.987570</td></tr> </tbody> </table>                                                                                                                                                                                                                                                                                                                                                                                                                                                                                                                                                                                                                                                                                                                                                                                                                                                                                                                                                                                                                                                                                                                                                                                                                                                                                                                                                                                                                                                                                                                                                                                                                                                                                                                                                                                                                                                                                                                                         |              | Sum of electronic and zero-point Energies= | -1365.940828 | Sum of electronic and thermal Energies= | -1365.922498 | Sum of electronic and thermal Enthalpies= | -1365.921554 | Sum of electronic and thermal Free Energies= | -1365.987570 |           |           |           |   |          |           |           |    |           |           |           |                                                                                    |           |          |           |   |          |           |           |   |          |          |           |   |          |          |           |   |          |           |          |   |          |          |           |   |          |           |           |   |          |          |           |   |          |          |           |   |          |          |          |   |          |          |          |   |          |          |          |   |           |          |           |   |           |          |          |   |           |          |           |   |           |          |           |   |           |          |           |   |           |          |           |   |           |          |          |   |          |           |          |   |          |           |          |   |          |           |          |   |          |           |          |   |           |           |           |   |           |           |          |                                                                                      |
| Sum of electronic and zero-point Energies=                                                                                                                                                                                                                                                                                                                                                                                                                                                                                                                                                                                                                                                                                                                                                                                                                                                                                                                                                                                                                                                                                                                                                                                                                                                                                                                                                                                                                                                                                                                                                                                                                                                                                                                                                                                                                                                                                                                                                                                                                                                                                                                                                                                                                                                                                                                        | -1365.940828 |                                            |              |                                         |              |                                           |              |                                              |              |           |           |           |   |          |           |           |    |           |           |           |                                                                                    |           |          |           |   |          |           |           |   |          |          |           |   |          |          |           |   |          |           |          |   |          |          |           |   |          |           |           |   |          |          |           |   |          |          |           |   |          |          |          |   |          |          |          |   |          |          |          |   |           |          |           |   |           |          |          |   |           |          |           |   |           |          |           |   |           |          |           |   |           |          |           |   |           |          |          |   |          |           |          |   |          |           |          |   |          |           |          |   |          |           |          |   |           |           |           |   |           |           |          |                                                                                      |
| Sum of electronic and thermal Energies=                                                                                                                                                                                                                                                                                                                                                                                                                                                                                                                                                                                                                                                                                                                                                                                                                                                                                                                                                                                                                                                                                                                                                                                                                                                                                                                                                                                                                                                                                                                                                                                                                                                                                                                                                                                                                                                                                                                                                                                                                                                                                                                                                                                                                                                                                                                           | -1365.922498 |                                            |              |                                         |              |                                           |              |                                              |              |           |           |           |   |          |           |           |    |           |           |           |                                                                                    |           |          |           |   |          |           |           |   |          |          |           |   |          |          |           |   |          |           |          |   |          |          |           |   |          |           |           |   |          |          |           |   |          |          |           |   |          |          |          |   |          |          |          |   |          |          |          |   |           |          |           |   |           |          |          |   |           |          |           |   |           |          |           |   |           |          |           |   |           |          |           |   |           |          |          |   |          |           |          |   |          |           |          |   |          |           |          |   |          |           |          |   |           |           |           |   |           |           |          |                                                                                      |
| Sum of electronic and thermal Enthalpies=                                                                                                                                                                                                                                                                                                                                                                                                                                                                                                                                                                                                                                                                                                                                                                                                                                                                                                                                                                                                                                                                                                                                                                                                                                                                                                                                                                                                                                                                                                                                                                                                                                                                                                                                                                                                                                                                                                                                                                                                                                                                                                                                                                                                                                                                                                                         | -1365.921554 |                                            |              |                                         |              |                                           |              |                                              |              |           |           |           |   |          |           |           |    |           |           |           |                                                                                    |           |          |           |   |          |           |           |   |          |          |           |   |          |          |           |   |          |           |          |   |          |          |           |   |          |           |           |   |          |          |           |   |          |          |           |   |          |          |          |   |          |          |          |   |          |          |          |   |           |          |           |   |           |          |          |   |           |          |           |   |           |          |           |   |           |          |           |   |           |          |           |   |           |          |          |   |          |           |          |   |          |           |          |   |          |           |          |   |          |           |          |   |           |           |           |   |           |           |          |                                                                                      |
| Sum of electronic and thermal Free Energies=                                                                                                                                                                                                                                                                                                                                                                                                                                                                                                                                                                                                                                                                                                                                                                                                                                                                                                                                                                                                                                                                                                                                                                                                                                                                                                                                                                                                                                                                                                                                                                                                                                                                                                                                                                                                                                                                                                                                                                                                                                                                                                                                                                                                                                                                                                                      | -1365.987570 |                                            |              |                                         |              |                                           |              |                                              |              |           |           |           |   |          |           |           |    |           |           |           |                                                                                    |           |          |           |   |          |           |           |   |          |          |           |   |          |          |           |   |          |           |          |   |          |          |           |   |          |           |           |   |          |          |           |   |          |          |           |   |          |          |          |   |          |          |          |   |          |          |          |   |           |          |           |   |           |          |          |   |           |          |           |   |           |          |           |   |           |          |           |   |           |          |           |   |           |          |          |   |          |           |          |   |          |           |          |   |          |           |          |   |          |           |          |   |           |           |           |   |           |           |          |                                                                                      |

**Conformer 22b** with SMD<sup>toluene</sup>

|   |           |           |           |
|---|-----------|-----------|-----------|
| C | 0.501000  | -2.301000 | 0.390000  |
| C | 1.769000  | -2.018000 | 0.092000  |
| H | 0.205000  | -3.286000 | 0.736000  |
| H | 2.564000  | -2.751000 | 0.187000  |
| C | -0.615000 | -1.332000 | 0.203000  |
| C | 2.165000  | -0.670000 | -0.457000 |
| C | 2.062000  | -0.690000 | -1.992000 |
| H | 2.736000  | -1.447000 | -2.399000 |
| H | 2.325000  | 0.281000  | -2.421000 |
| H | 1.042000  | -0.926000 | -2.299000 |
| O | 3.527000  | -0.491000 | -0.038000 |
| C | 1.217000  | 0.422000  | 0.131000  |
| H | 1.377000  | 1.333000  | -0.449000 |
| C | -0.260000 | 0.023000  | -0.001000 |
| C | -1.231000 | 1.048000  | -0.196000 |
| O | -0.678000 | 2.300000  | -0.309000 |
| C | -1.588000 | 3.386000  | -0.500000 |
| H | -0.968000 | 4.278000  | -0.581000 |
| H | -2.269000 | 3.486000  | 0.349000  |
| H | -2.176000 | 3.256000  | -1.413000 |
| C | 1.546000  | 0.743000  | 1.528000  |
| C | 1.784000  | 1.034000  | 2.672000  |
| H | 1.996000  | 1.277000  | 3.686000  |
| O | -2.467000 | 0.935000  | -0.279000 |
| C | 4.177000  | 0.714000  | -0.418000 |
| H | 5.149000  | 0.701000  | 0.078000  |
| H | 4.341000  | 0.776000  | -1.501000 |
| H | 3.638000  | 1.608000  | -0.084000 |
| O | -1.787000 | -1.815000 | 0.228000  |
| K | -4.099000 | -0.957000 | 0.031000  |

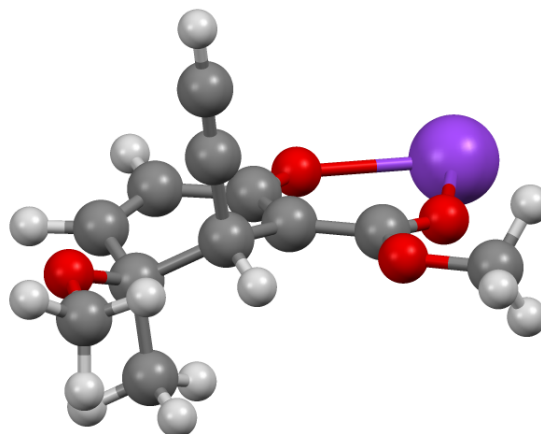

\*\*\* 0 imaginary frequencies \*\*\*

|                                              |              |
|----------------------------------------------|--------------|
| Sum of electronic and zero-point Energies=   | -1365.951292 |
| Sum of electronic and thermal Energies=      | -1365.932965 |
| Sum of electronic and thermal Enthalpies=    | -1365.932020 |
| Sum of electronic and thermal Free Energies= | -1365.998106 |



**Transition structure TS-1 with SMD<sup>toluene</sup>**

|    |           |           |           |
|----|-----------|-----------|-----------|
| C  | -2.091000 | -0.209000 | -1.953000 |
| C  | -0.896000 | 0.295000  | -2.255000 |
| H  | -2.811000 | -0.445000 | -2.730000 |
| H  | -0.592000 | 0.499000  | -3.276000 |
| C  | 0.082000  | 0.673000  | -1.208000 |
| C  | -0.000000 | -0.029000 | 0.051000  |
| C  | -2.511000 | -0.384000 | -0.505000 |
| C  | -1.278000 | -0.872000 | 0.328000  |
| H  | -1.096000 | -1.901000 | -0.010000 |
| O  | -2.857000 | 0.895000  | 0.063000  |
| C  | -3.670000 | -1.379000 | -0.401000 |
| H  | -4.494000 | -1.083000 | -1.054000 |
| H  | -3.344000 | -2.374000 | -0.716000 |
| H  | -4.037000 | -1.437000 | 0.624000  |
| C  | -1.680000 | -0.960000 | 1.735000  |
| H  | -2.425000 | -1.158000 | 3.866000  |
| C  | -2.086000 | -1.068000 | 2.861000  |
| C  | 0.846000  | 0.413000  | 1.164000  |
| O  | 1.478000  | 1.467000  | 1.243000  |
| O  | 0.942000  | -0.513000 | 2.134000  |
| C  | 1.644000  | -0.149000 | 3.333000  |
| H  | 2.701000  | 0.026000  | 3.126000  |
| H  | 1.528000  | -0.998000 | 4.004000  |
| H  | 1.206000  | 0.746000  | 3.780000  |
| C  | -3.921000 | 1.609000  | -0.549000 |
| H  | -4.880000 | 1.085000  | -0.464000 |
| H  | -3.998000 | 2.555000  | -0.011000 |
| H  | -3.722000 | 1.827000  | -1.606000 |
| O  | 0.980000  | 1.483000  | -1.532000 |
| K  | 2.632000  | 3.013000  | -0.426000 |
| C  | 1.450000  | -1.554000 | -0.650000 |
| H  | 0.837000  | -1.836000 | -1.488000 |
| H  | 2.229000  | -0.825000 | -0.789000 |
| H  | 1.349000  | -2.073000 | 0.287000  |
| Cl | 3.051000  | -3.224000 | -1.319000 |

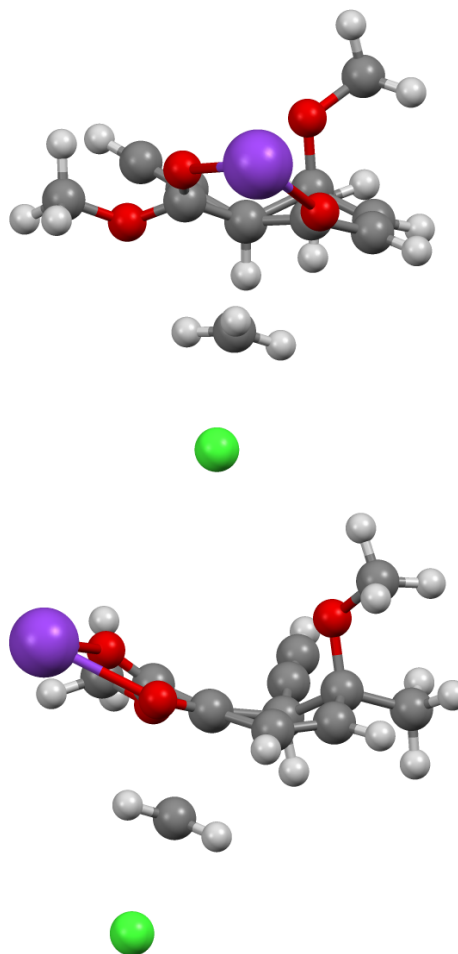

\*\*\* 1 imaginary frequency = -474.6927 \*\*\*

|                                              |              |
|----------------------------------------------|--------------|
| Sum of electronic and zero-point Energies=   | -1866.034412 |
| Sum of electronic and thermal Energies=      | -1866.012196 |
| Sum of electronic and thermal Enthalpies=    | -1866.011251 |
| Sum of electronic and thermal Free Energies= | -1866.087099 |

**Transition structure TS-2 with SMD<sup>toluene</sup>**

|    |           |           |           |
|----|-----------|-----------|-----------|
| C  | 2.406000  | -0.572000 | -1.785000 |
| C  | 1.205000  | -0.539000 | -2.366000 |
| H  | 3.274000  | -0.926000 | -2.333000 |
| H  | 1.055000  | -0.865000 | -3.390000 |
| C  | -0.020000 | -0.104000 | -1.659000 |
| C  | 0.153000  | 0.642000  | -0.429000 |
| C  | 2.588000  | -0.215000 | -0.323000 |
| C  | 1.589000  | 0.925000  | 0.046000  |
| H  | 1.959000  | 1.823000  | -0.467000 |
| O  | 2.211000  | -1.333000 | 0.507000  |
| C  | 4.031000  | 0.216000  | -0.044000 |
| H  | 4.736000  | -0.561000 | -0.348000 |
| H  | 4.274000  | 1.121000  | -0.606000 |
| H  | 4.169000  | 0.416000  | 1.020000  |
| C  | 1.642000  | 1.194000  | 1.487000  |
| H  | 1.730000  | 1.583000  | 3.718000  |
| C  | 1.692000  | 1.401000  | 2.670000  |
| C  | -0.854000 | 1.674000  | -0.177000 |
| O  | -2.072000 | 1.556000  | -0.313000 |
| O  | -0.316000 | 2.839000  | 0.244000  |
| C  | -1.234000 | 3.873000  | 0.639000  |
| H  | -1.828000 | 4.211000  | -0.213000 |
| H  | -0.613000 | 4.685000  | 1.012000  |
| H  | -1.901000 | 3.516000  | 1.427000  |
| C  | 2.891000  | -2.564000 | 0.302000  |
| H  | 3.961000  | -2.495000 | 0.531000  |
| H  | 2.436000  | -3.276000 | 0.993000  |
| H  | 2.763000  | -2.944000 | -0.719000 |
| O  | -1.126000 | -0.413000 | -2.158000 |
| K  | -3.440000 | -0.647000 | -0.900000 |
| C  | -0.817000 | -0.970000 | 0.915000  |
| H  | 0.040000  | -1.179000 | 1.533000  |
| H  | -1.490000 | -0.186000 | 1.199000  |
| H  | -0.925000 | -1.520000 | 0.002000  |
| Cl | -2.323000 | -2.475000 | 1.874000  |

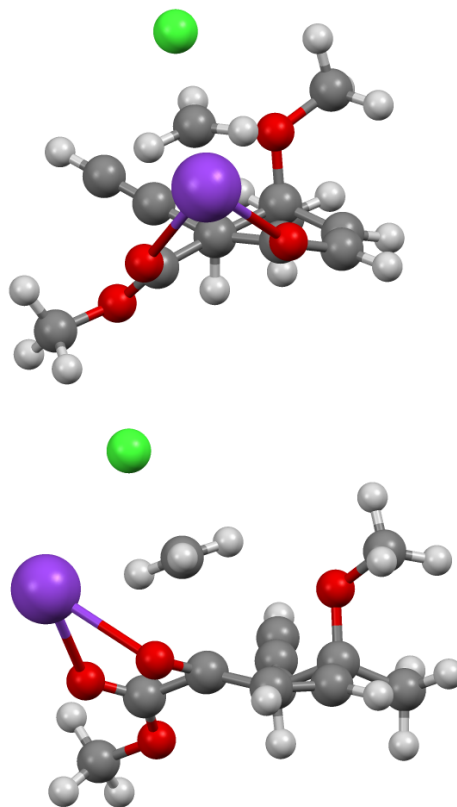

\*\*\* 1 imaginary frequency = -485.8644 \*\*\*

|                                              |              |
|----------------------------------------------|--------------|
| Sum of electronic and zero-point Energies=   | -1866.047039 |
| Sum of electronic and thermal Energies=      | -1866.024751 |
| Sum of electronic and thermal Enthalpies=    | -1866.023807 |
| Sum of electronic and thermal Free Energies= | -1866.098817 |

**Transition structure TS-3 with SMD<sup>toluene</sup>**

|    |           |           |           |
|----|-----------|-----------|-----------|
| C  | 0.909000  | -1.155000 | 2.075000  |
| C  | 2.030000  | -1.520000 | 1.449000  |
| H  | 0.671000  | -1.518000 | 3.069000  |
| H  | 2.750000  | -2.185000 | 1.916000  |
| C  | -0.132000 | -0.300000 | 1.459000  |
| C  | 2.351000  | -1.091000 | 0.041000  |
| C  | 1.890000  | -2.181000 | -0.943000 |
| H  | 2.504000  | -3.072000 | -0.798000 |
| H  | 1.991000  | -1.853000 | -1.980000 |
| H  | 0.852000  | -2.457000 | -0.770000 |
| O  | 3.780000  | -0.977000 | 0.020000  |
| C  | 1.670000  | 0.289000  | -0.248000 |
| H  | 1.713000  | 0.462000  | -1.326000 |
| C  | 0.191000  | 0.336000  | 0.191000  |
| C  | -0.566000 | 1.519000  | -0.216000 |
| O  | 0.082000  | 2.256000  | -1.146000 |
| C  | -0.606000 | 3.419000  | -1.640000 |
| H  | 0.074000  | 3.874000  | -2.358000 |
| H  | -0.819000 | 4.117000  | -0.827000 |
| H  | -1.540000 | 3.138000  | -2.130000 |
| C  | 2.414000  | 1.376000  | 0.407000  |
| C  | 2.992000  | 2.279000  | 0.951000  |
| H  | 3.509000  | 3.072000  | 1.437000  |
| O  | -1.701000 | 1.830000  | 0.150000  |
| C  | 4.392000  | -0.640000 | -1.220000 |
| H  | 5.449000  | -0.485000 | -1.000000 |
| H  | 4.305000  | -1.445000 | -1.959000 |
| H  | 3.995000  | 0.288000  | -1.647000 |
| O  | -1.243000 | -0.241000 | 2.025000  |
| K  | -3.631000 | 0.243000  | 1.157000  |
| C  | -1.314000 | -1.017000 | -0.952000 |
| H  | -1.240000 | -1.746000 | -0.170000 |
| H  | -1.916000 | -0.144000 | -0.857000 |
| H  | -0.786000 | -1.172000 | -1.880000 |
| Cl | -3.364000 | -2.019000 | -1.601000 |

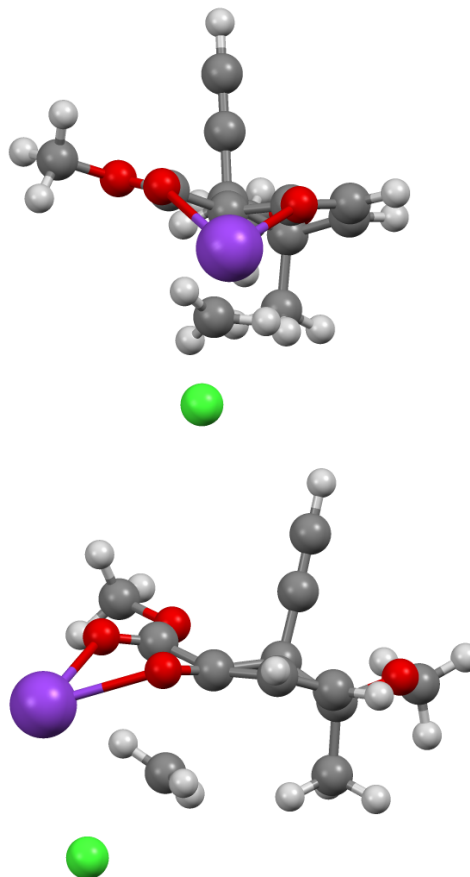

\*\*\* 1 imaginary frequency = -477.7543 \*\*\*

|                                              |              |
|----------------------------------------------|--------------|
| Sum of electronic and zero-point Energies=   | -1866.045271 |
| Sum of electronic and thermal Energies=      | -1866.023201 |
| Sum of electronic and thermal Enthalpies=    | -1866.022257 |
| Sum of electronic and thermal Free Energies= | -1866.096641 |

**Transition structure TS-4 with SMD<sup>toluene</sup>**

|    |           |           |           |
|----|-----------|-----------|-----------|
| C  | -1.078000 | -0.834000 | 2.241000  |
| C  | -2.343000 | -0.689000 | 1.837000  |
| H  | -0.830000 | -1.289000 | 3.194000  |
| H  | -3.177000 | -1.028000 | 2.442000  |
| C  | 0.060000  | -0.283000 | 1.474000  |
| C  | -2.701000 | -0.013000 | 0.534000  |
| C  | -2.878000 | 1.499000  | 0.763000  |
| H  | -3.697000 | 1.667000  | 1.466000  |
| H  | -3.105000 | 2.016000  | -0.171000 |
| H  | -1.970000 | 1.938000  | 1.178000  |
| O  | -3.940000 | -0.620000 | 0.149000  |
| C  | -1.557000 | -0.291000 | -0.498000 |
| H  | -1.742000 | 0.325000  | -1.377000 |
| C  | -0.188000 | 0.112000  | 0.087000  |
| C  | 0.436000  | 1.343000  | -0.373000 |
| O  | -0.206000 | 1.916000  | -1.424000 |
| C  | 0.394000  | 3.103000  | -1.972000 |
| H  | -0.243000 | 3.391000  | -2.807000 |
| H  | 1.407000  | 2.900000  | -2.324000 |
| H  | 0.423000  | 3.902000  | -1.228000 |
| C  | -1.576000 | -1.690000 | -0.937000 |
| C  | -1.583000 | -2.828000 | -1.325000 |
| H  | -1.587000 | -3.840000 | -1.658000 |
| O  | 1.469000  | 1.851000  | 0.070000  |
| C  | -4.509000 | -0.225000 | -1.093000 |
| H  | -4.772000 | 0.839000  | -1.113000 |
| H  | -3.857000 | -0.453000 | -1.943000 |
| H  | -5.425000 | -0.809000 | -1.200000 |
| O  | 1.163000  | -0.176000 | 2.047000  |
| K  | 3.551000  | 0.655000  | 1.185000  |
| C  | 1.573000  | -1.062000 | -0.829000 |
| H  | 1.788000  | -0.251000 | -1.499000 |
| H  | 1.856000  | -1.055000 | 0.200000  |
| H  | 1.042000  | -1.920000 | -1.210000 |
| Cl | 3.778000  | -1.847000 | -1.215000 |

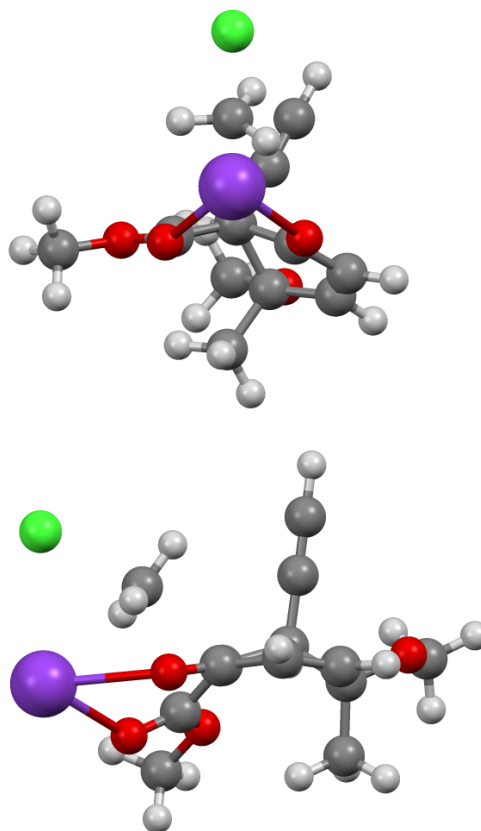

\*\*\* 1 imaginary frequency = -475.8786 \*\*\*

|                                              |              |
|----------------------------------------------|--------------|
| Sum of electronic and zero-point Energies=   | -1866.046342 |
| Sum of electronic and thermal Energies=      | -1866.024276 |
| Sum of electronic and thermal Enthalpies=    | -1866.023332 |
| Sum of electronic and thermal Free Energies= | -1866.097530 |

**20<sub>AX</sub>** with SMD<sup>THF</sup>

|    |           |           |           |
|----|-----------|-----------|-----------|
| C  | 1.397000  | -0.576000 | -0.380000 |
| C  | 1.581000  | 0.237000  | 2.073000  |
| C  | 1.454000  | 1.611000  | 1.475000  |
| C  | 0.970000  | 1.861000  | 0.257000  |
| C  | 0.547000  | 0.707000  | -0.655000 |
| H  | 0.923000  | 0.123000  | 2.941000  |
| H  | 1.758000  | 2.440000  | 2.109000  |
| H  | 0.748000  | 0.992000  | -1.692000 |
| H  | 2.600000  | 0.076000  | 2.448000  |
| C  | 0.791000  | 3.240000  | -0.306000 |
| H  | 1.067000  | 4.010000  | 0.418000  |
| H  | 1.400000  | 3.374000  | -1.207000 |
| H  | -0.252000 | 3.402000  | -0.601000 |
| C  | -0.887000 | 0.447000  | -0.517000 |
| C  | -2.068000 | 0.216000  | -0.364000 |
| Si | -3.850000 | -0.193000 | -0.090000 |
| C  | -4.180000 | -0.128000 | 1.761000  |
| H  | -5.229000 | -0.362000 | 1.974000  |
| H  | -3.557000 | -0.850000 | 2.297000  |
| H  | -3.967000 | 0.867000  | 2.164000  |
| C  | -4.902000 | 1.074000  | -0.997000 |
| H  | -4.700000 | 1.061000  | -2.073000 |
| H  | -5.967000 | 0.862000  | -0.851000 |
| H  | -4.707000 | 2.087000  | -0.629000 |
| C  | -4.156000 | -1.922000 | -0.764000 |
| H  | -5.200000 | -2.215000 | -0.613000 |
| H  | -3.944000 | -1.970000 | -1.837000 |
| H  | -3.523000 | -2.659000 | -0.261000 |
| C  | 0.966000  | -1.762000 | -1.255000 |
| H  | 0.995000  | -1.479000 | -2.309000 |
| H  | 1.624000  | -2.618000 | -1.100000 |
| H  | -0.049000 | -2.066000 | -0.999000 |
| C  | 2.852000  | -0.248000 | -0.754000 |
| O  | 3.178000  | 0.407000  | -1.715000 |
| O  | 3.717000  | -0.842000 | 0.078000  |
| C  | 5.125000  | -0.675000 | -0.214000 |
| H  | 5.648000  | -1.214000 | 0.573000  |
| H  | 5.361000  | -1.101000 | -1.190000 |
| H  | 5.393000  | 0.382000  | -0.196000 |
| C  | 1.285000  | -0.904000 | 1.119000  |
| O  | 0.958000  | -2.002000 | 1.514000  |

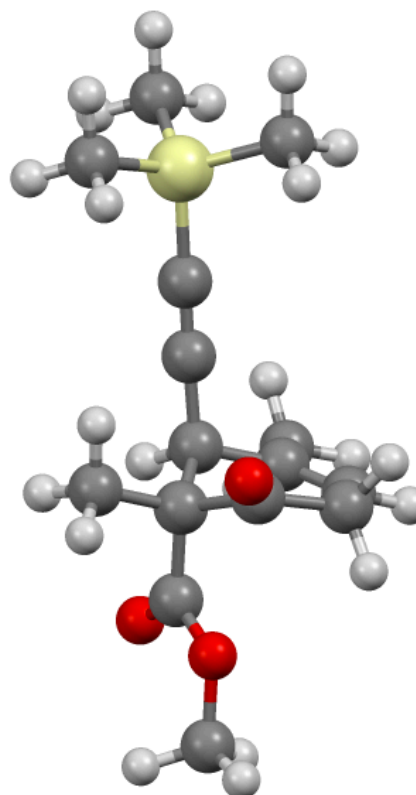

\*\*\* 0 imaginary frequencies \*\*\*

|                                              |              |
|----------------------------------------------|--------------|
| Sum of electronic and zero-point Energies=   | -1099.980605 |
| Sum of electronic and thermal Energies=      | -1099.956932 |
| Sum of electronic and thermal Enthalpies=    | -1099.955988 |
| Sum of electronic and thermal Free Energies= | -1100.034400 |

**20<sub>EQ</sub> with SMD<sup>THF</sup>**

|    |           |           |           |
|----|-----------|-----------|-----------|
| C  | -0.802000 | -0.889000 | -0.593000 |
| C  | -1.659000 | 0.145000  | 0.221000  |
| C  | -3.459000 | -1.676000 | 0.517000  |
| C  | -2.371000 | -2.662000 | 0.192000  |
| C  | -1.170000 | -2.344000 | -0.295000 |
| H  | -1.019000 | -0.715000 | -1.655000 |
| H  | -3.660000 | -1.671000 | 1.599000  |
| H  | -4.402000 | -1.953000 | 0.039000  |
| H  | -2.617000 | -3.707000 | 0.358000  |
| C  | -1.278000 | 0.147000  | 1.719000  |
| H  | -0.271000 | 0.546000  | 1.847000  |
| H  | -1.968000 | 0.764000  | 2.295000  |
| H  | -1.297000 | -0.869000 | 2.115000  |
| C  | 0.621000  | -0.606000 | -0.401000 |
| C  | 1.790000  | -0.340000 | -0.218000 |
| Si | 3.565000  | 0.072000  | 0.088000  |
| C  | 4.414000  | -1.466000 | 0.761000  |
| H  | 5.469000  | -1.262000 | 0.973000  |
| H  | 3.941000  | -1.803000 | 1.688000  |
| H  | 4.367000  | -2.287000 | 0.039000  |
| C  | 4.341000  | 0.612000  | -1.536000 |
| H  | 3.832000  | 1.493000  | -1.940000 |
| H  | 5.397000  | 0.868000  | -1.391000 |
| H  | 4.288000  | -0.183000 | -2.287000 |
| C  | 3.620000  | 1.471000  | 1.344000  |
| H  | 4.656000  | 1.747000  | 1.569000  |
| H  | 3.109000  | 2.362000  | 0.964000  |
| H  | 3.138000  | 1.179000  | 2.282000  |
| C  | -3.141000 | -0.253000 | 0.121000  |
| O  | -4.001000 | 0.533000  | -0.215000 |
| C  | -0.146000 | -3.386000 | -0.653000 |
| H  | 0.166000  | -3.279000 | -1.698000 |
| H  | 0.757000  | -3.281000 | -0.045000 |
| H  | -0.545000 | -4.393000 | -0.514000 |
| C  | -1.505000 | 1.526000  | -0.431000 |
| O  | -1.353000 | 1.698000  | -1.619000 |
| O  | -1.577000 | 2.520000  | 0.459000  |
| C  | -1.490000 | 3.863000  | -0.070000 |
| H  | -2.304000 | 4.048000  | -0.772000 |
| H  | -1.576000 | 4.520000  | 0.793000  |
| H  | -0.530000 | 4.014000  | -0.567000 |

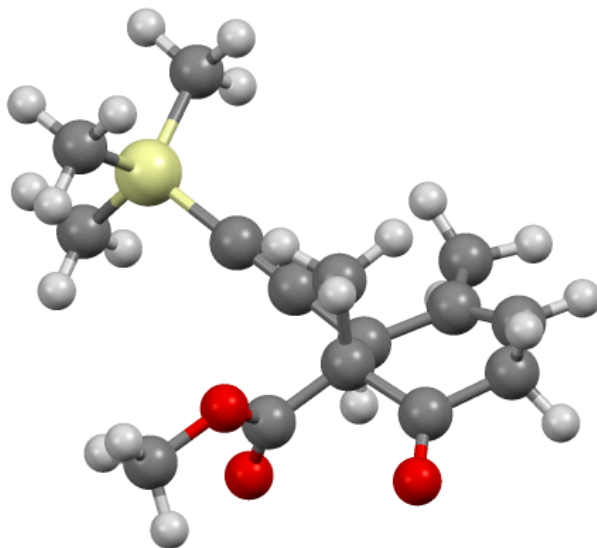

\*\*\* 0 imaginary frequencies \*\*\*

|                                              |              |
|----------------------------------------------|--------------|
| Sum of electronic and zero-point Energies=   | -1099.976658 |
| Sum of electronic and thermal Energies=      | -1099.953356 |
| Sum of electronic and thermal Enthalpies=    | -1099.952412 |
| Sum of electronic and thermal Free Energies= | -1100.029406 |

**20<sub>AX</sub>** with SMD<sup>MeOH</sup>

|    |           |           |           |
|----|-----------|-----------|-----------|
| C  | 1.404000  | -0.580000 | -0.385000 |
| C  | 1.573000  | 0.210000  | 2.075000  |
| C  | 1.448000  | 1.588000  | 1.489000  |
| C  | 0.964000  | 1.847000  | 0.272000  |
| C  | 0.539000  | 0.697000  | -0.644000 |
| H  | 0.905000  | 0.080000  | 2.934000  |
| H  | 1.756000  | 2.410000  | 2.129000  |
| H  | 0.727000  | 0.990000  | -1.682000 |
| H  | 2.588000  | 0.050000  | 2.463000  |
| C  | 0.795000  | 3.227000  | -0.288000 |
| H  | 1.070000  | 3.994000  | 0.439000  |
| H  | 1.414000  | 3.356000  | -1.185000 |
| H  | -0.244000 | 3.395000  | -0.593000 |
| C  | -0.891000 | 0.427000  | -0.499000 |
| C  | -2.074000 | 0.197000  | -0.348000 |
| Si | -3.865000 | -0.189000 | -0.089000 |
| C  | -4.209000 | -0.118000 | 1.757000  |
| H  | -5.263000 | -0.338000 | 1.959000  |
| H  | -3.600000 | -0.847000 | 2.301000  |
| H  | -3.988000 | 0.876000  | 2.161000  |
| C  | -4.887000 | 1.094000  | -1.008000 |
| H  | -4.674000 | 1.078000  | -2.081000 |
| H  | -5.956000 | 0.896000  | -0.872000 |
| H  | -4.682000 | 2.103000  | -0.636000 |
| C  | -4.185000 | -1.913000 | -0.768000 |
| H  | -5.236000 | -2.190000 | -0.628000 |
| H  | -3.963000 | -1.963000 | -1.839000 |
| H  | -3.568000 | -2.660000 | -0.259000 |
| C  | 0.989000  | -1.762000 | -1.273000 |
| H  | 1.018000  | -1.465000 | -2.323000 |
| H  | 1.660000  | -2.610000 | -1.126000 |
| H  | -0.025000 | -2.079000 | -1.023000 |
| C  | 2.855000  | -0.234000 | -0.751000 |
| O  | 3.173000  | 0.445000  | -1.704000 |
| O  | 3.724000  | -0.829000 | 0.064000  |
| C  | 5.135000  | -0.638000 | -0.220000 |
| H  | 5.660000  | -1.168000 | 0.572000  |
| H  | 5.378000  | -1.065000 | -1.194000 |
| H  | 5.378000  | 0.425000  | -0.200000 |
| C  | 1.303000  | -0.920000 | 1.108000  |
| O  | 1.002000  | -2.034000 | 1.493000  |

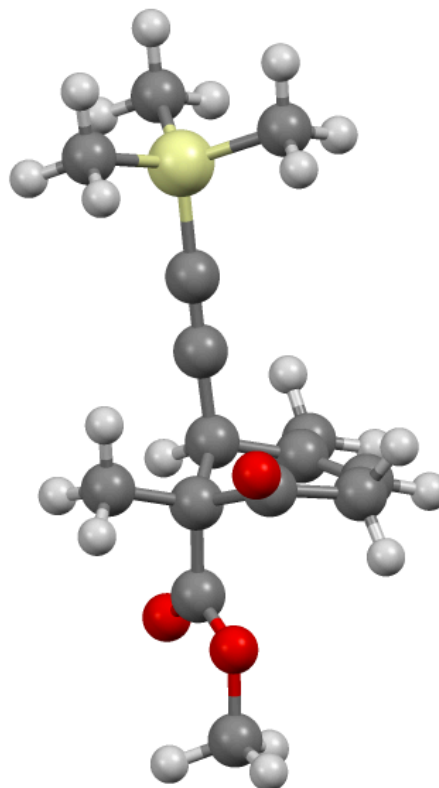

\*\*\* 1 imaginary frequency = -474.6927 \*\*\*

|                                              |              |
|----------------------------------------------|--------------|
| Sum of electronic and zero-point Energies=   | -1099.981321 |
| Sum of electronic and thermal Energies=      | -1099.957646 |
| Sum of electronic and thermal Enthalpies=    | -1099.956701 |
| Sum of electronic and thermal Free Energies= | -1100.035426 |

**20<sub>EQ</sub> with SMD<sup>MeOH</sup>**

|    |           |           |           |
|----|-----------|-----------|-----------|
| C  | -0.801000 | -0.898000 | -0.594000 |
| C  | -1.658000 | 0.138000  | 0.218000  |
| C  | -3.481000 | -1.664000 | 0.459000  |
| C  | -2.387000 | -2.657000 | 0.181000  |
| C  | -1.172000 | -2.349000 | -0.279000 |
| H  | -1.024000 | -0.738000 | -1.657000 |
| H  | -3.728000 | -1.659000 | 1.531000  |
| H  | -4.406000 | -1.932000 | -0.061000 |
| H  | -2.640000 | -3.698000 | 0.362000  |
| C  | -1.299000 | 0.128000  | 1.721000  |
| H  | -0.292000 | 0.524000  | 1.863000  |
| H  | -1.997000 | 0.741000  | 2.292000  |
| H  | -1.327000 | -0.891000 | 2.109000  |
| C  | 0.621000  | -0.609000 | -0.408000 |
| C  | 1.789000  | -0.337000 | -0.229000 |
| Si | 3.566000  | 0.074000  | 0.082000  |
| C  | 4.405000  | -1.467000 | 0.757000  |
| H  | 5.460000  | -1.266000 | 0.972000  |
| H  | 3.928000  | -1.801000 | 1.684000  |
| H  | 4.358000  | -2.289000 | 0.035000  |
| C  | 4.343000  | 0.609000  | -1.543000 |
| H  | 3.838000  | 1.492000  | -1.947000 |
| H  | 5.399000  | 0.862000  | -1.395000 |
| H  | 4.290000  | -0.186000 | -2.293000 |
| C  | 3.616000  | 1.474000  | 1.334000  |
| H  | 4.652000  | 1.747000  | 1.562000  |
| H  | 3.108000  | 2.365000  | 0.952000  |
| H  | 3.131000  | 1.184000  | 2.272000  |
| C  | -3.137000 | -0.246000 | 0.090000  |
| O  | -3.983000 | 0.561000  | -0.253000 |
| C  | -0.137000 | -3.395000 | -0.584000 |
| H  | 0.210000  | -3.309000 | -1.620000 |
| H  | 0.746000  | -3.277000 | 0.053000  |
| H  | -0.539000 | -4.400000 | -0.437000 |
| C  | -1.488000 | 1.525000  | -0.413000 |
| O  | -1.304000 | 1.708000  | -1.600000 |
| O  | -1.592000 | 2.510000  | 0.474000  |
| C  | -1.491000 | 3.864000  | -0.037000 |
| H  | -2.280000 | 4.047000  | -0.767000 |
| H  | -1.615000 | 4.507000  | 0.831000  |
| H  | -0.511000 | 4.019000  | -0.492000 |

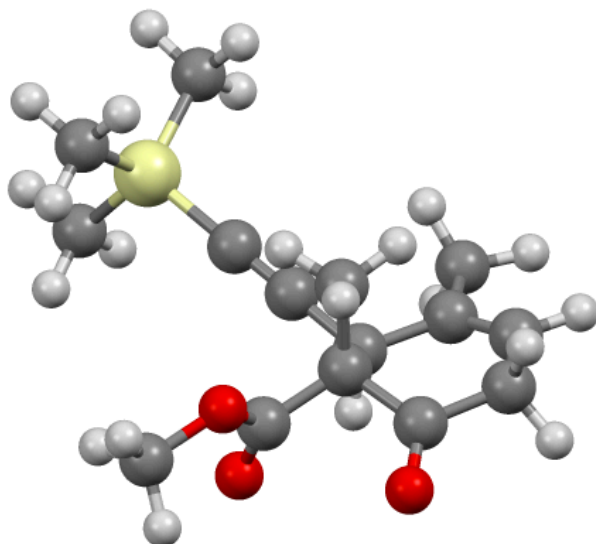

\*\*\* 1 imaginary frequency = -485.8644 \*\*\*

|                                              |              |
|----------------------------------------------|--------------|
| Sum of electronic and zero-point Energies=   | -1099.977536 |
| Sum of electronic and thermal Energies=      | -1099.954207 |
| Sum of electronic and thermal Enthalpies=    | -1099.953263 |
| Sum of electronic and thermal Free Energies= | -1100.030730 |



# NMR Spectra

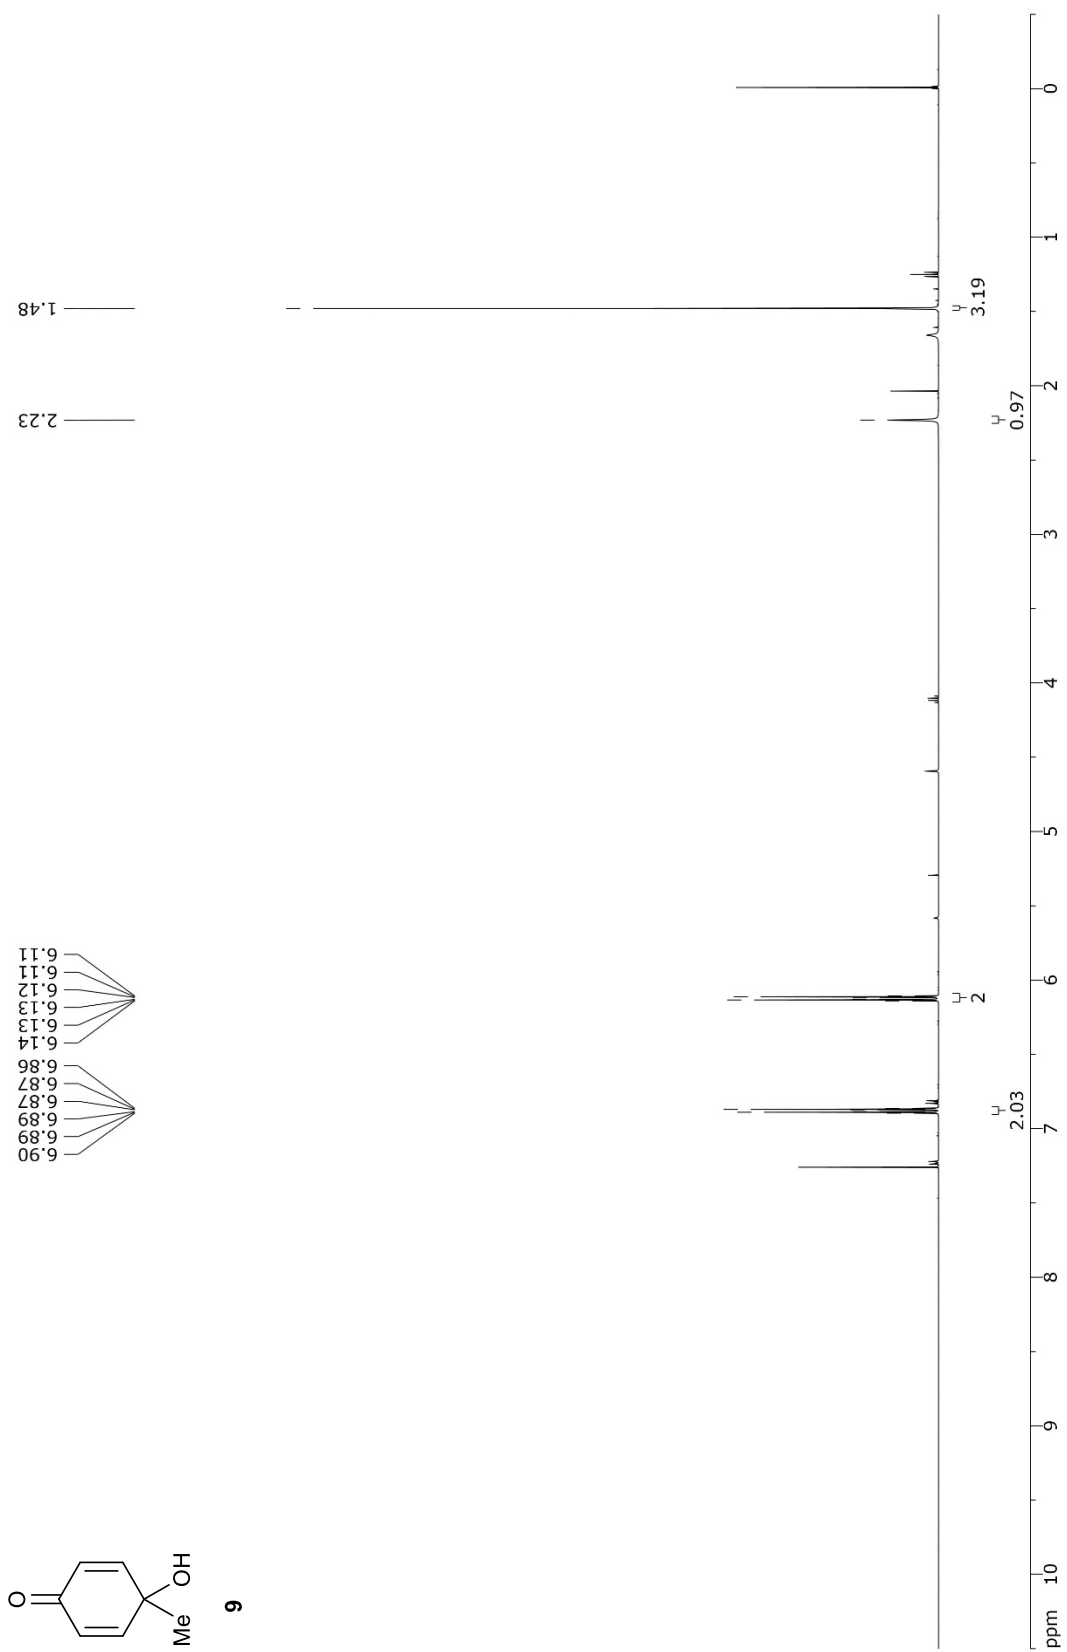

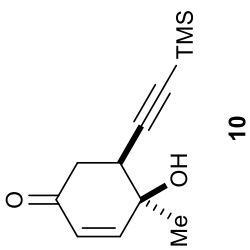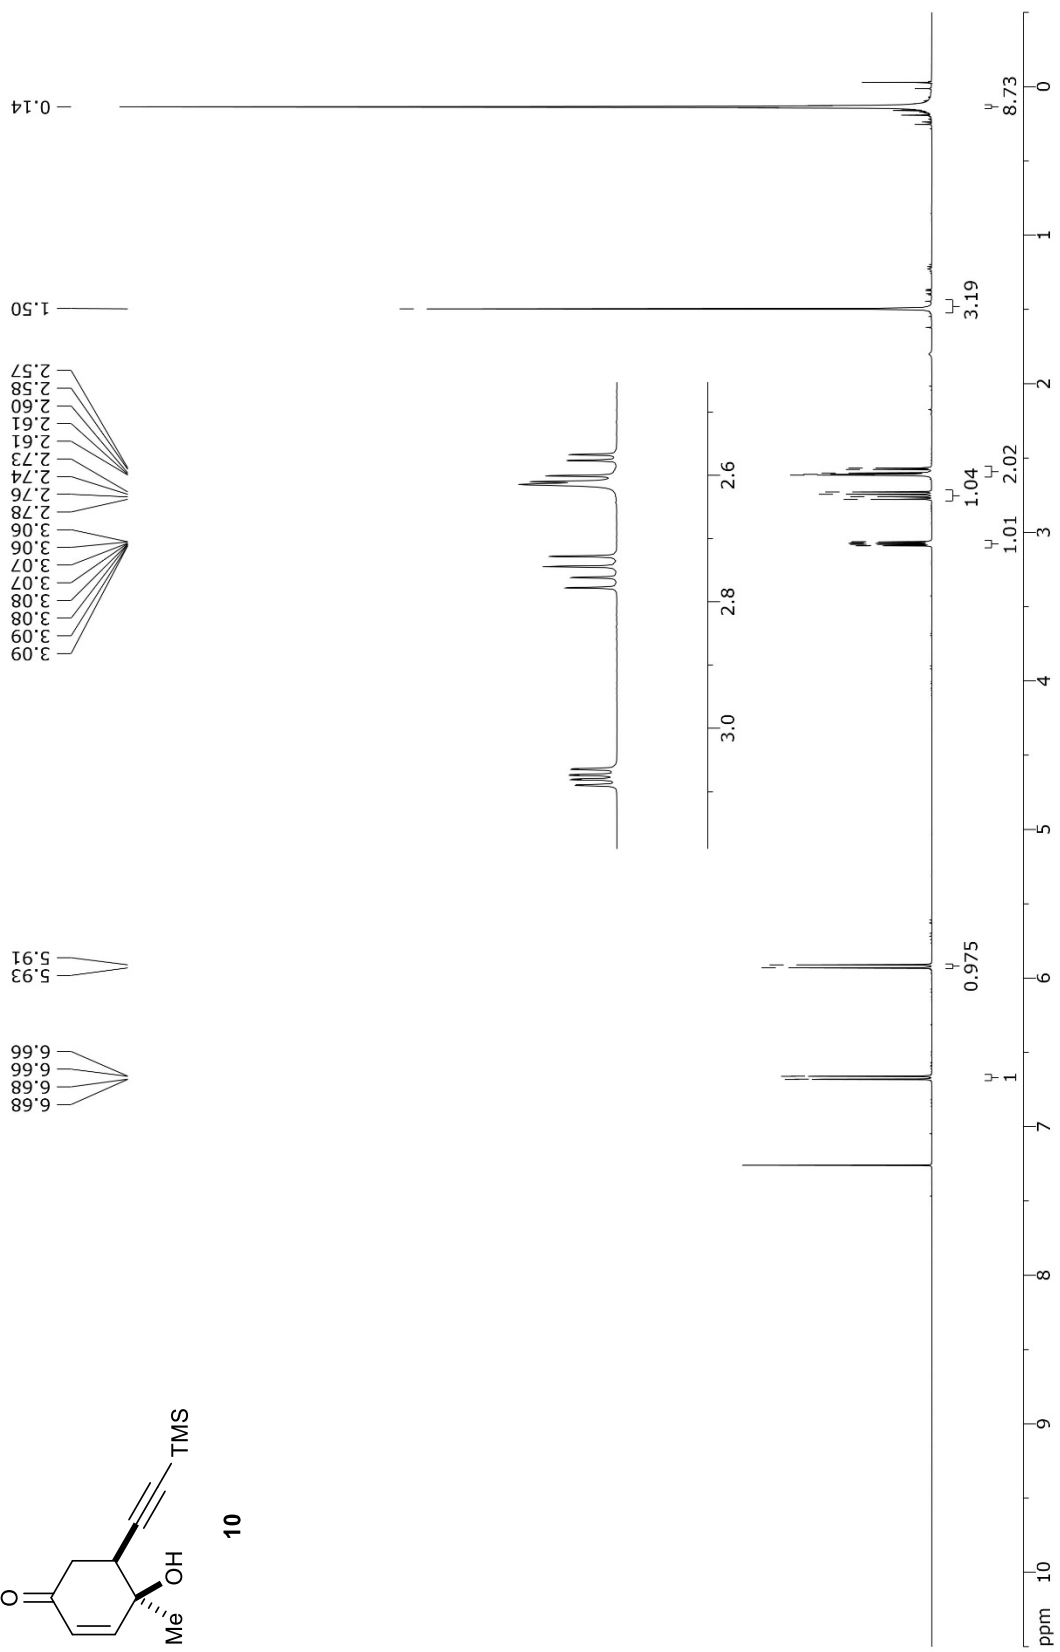

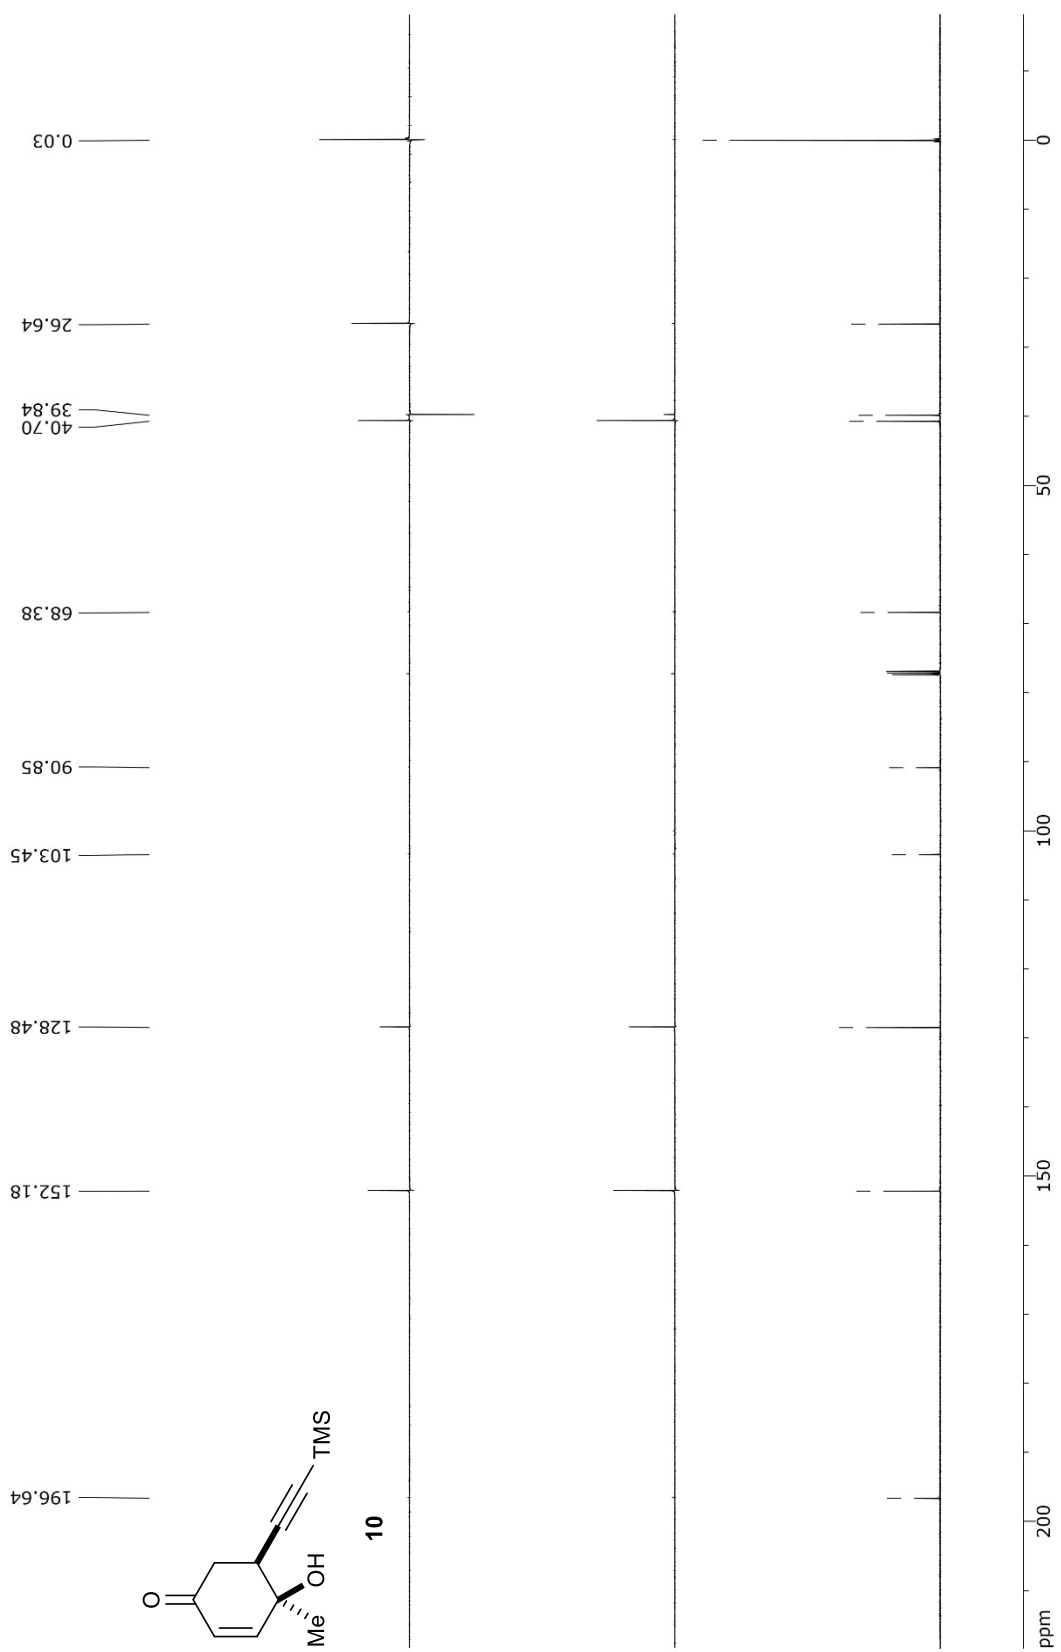

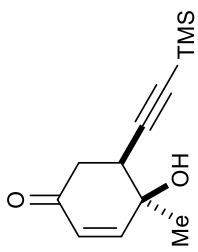

<sup>10</sup>  
NOE 3.10 ppm

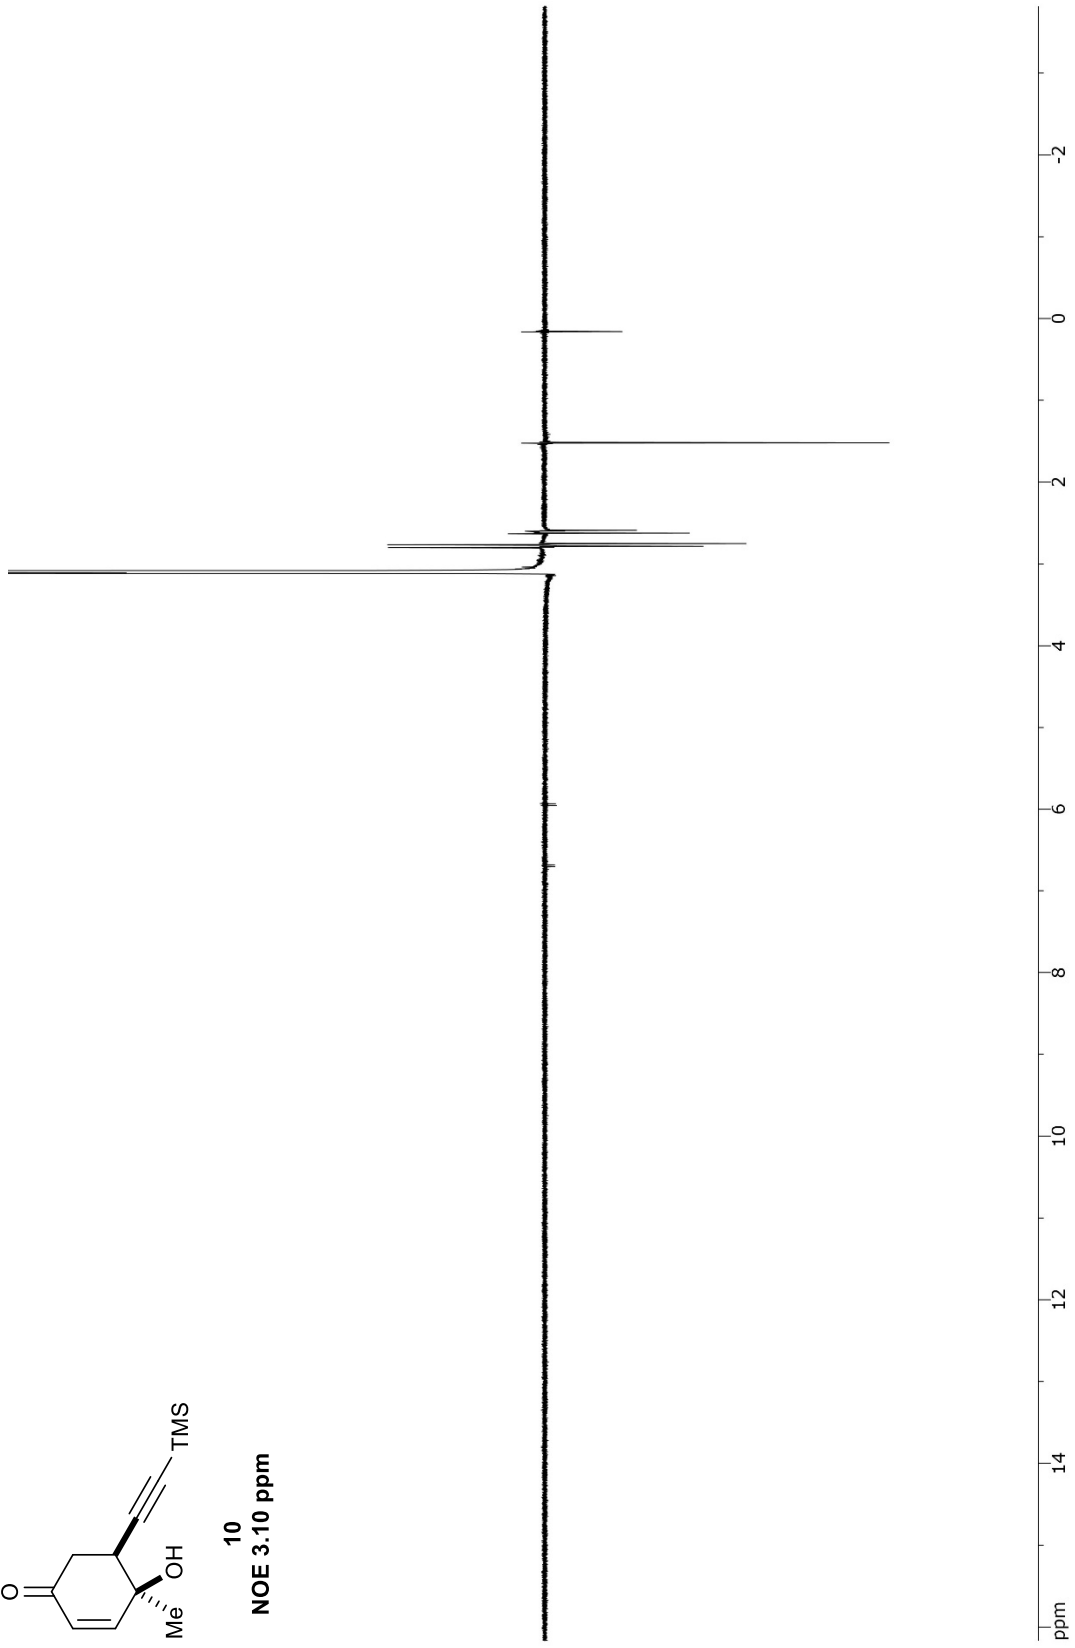



10  
NOE 1.52 ppm

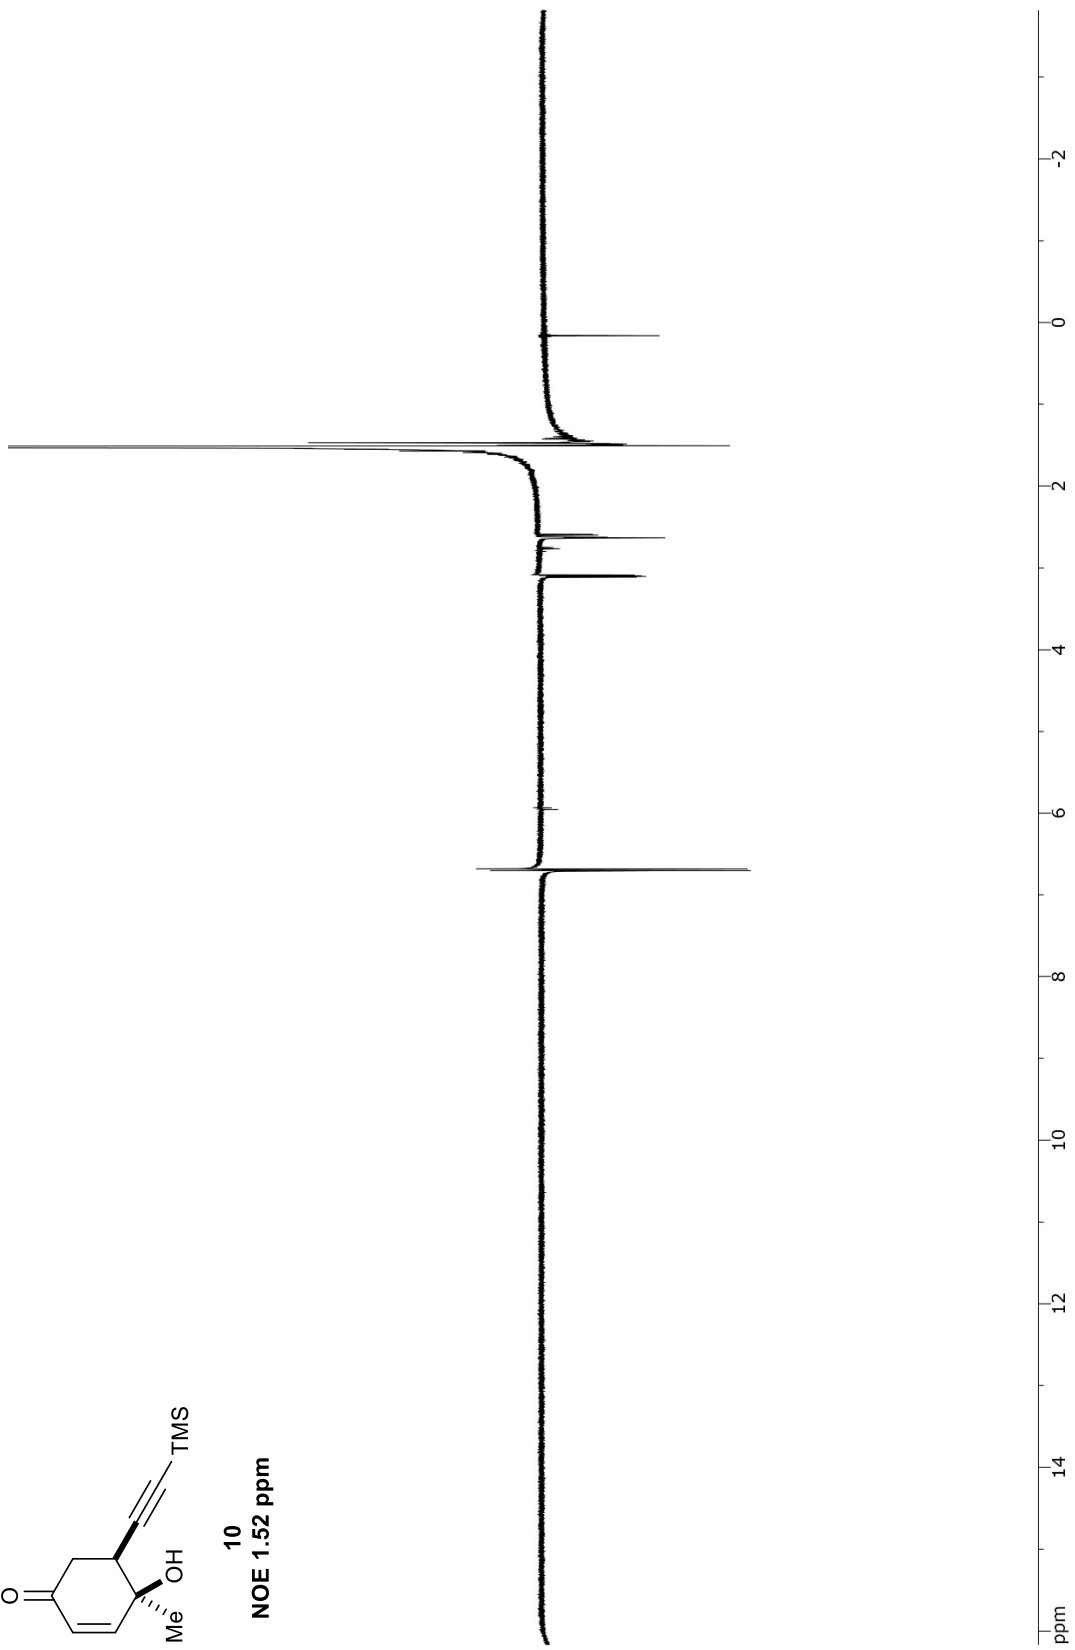

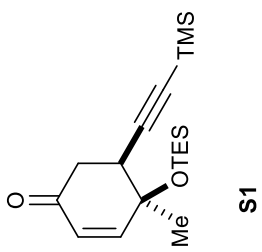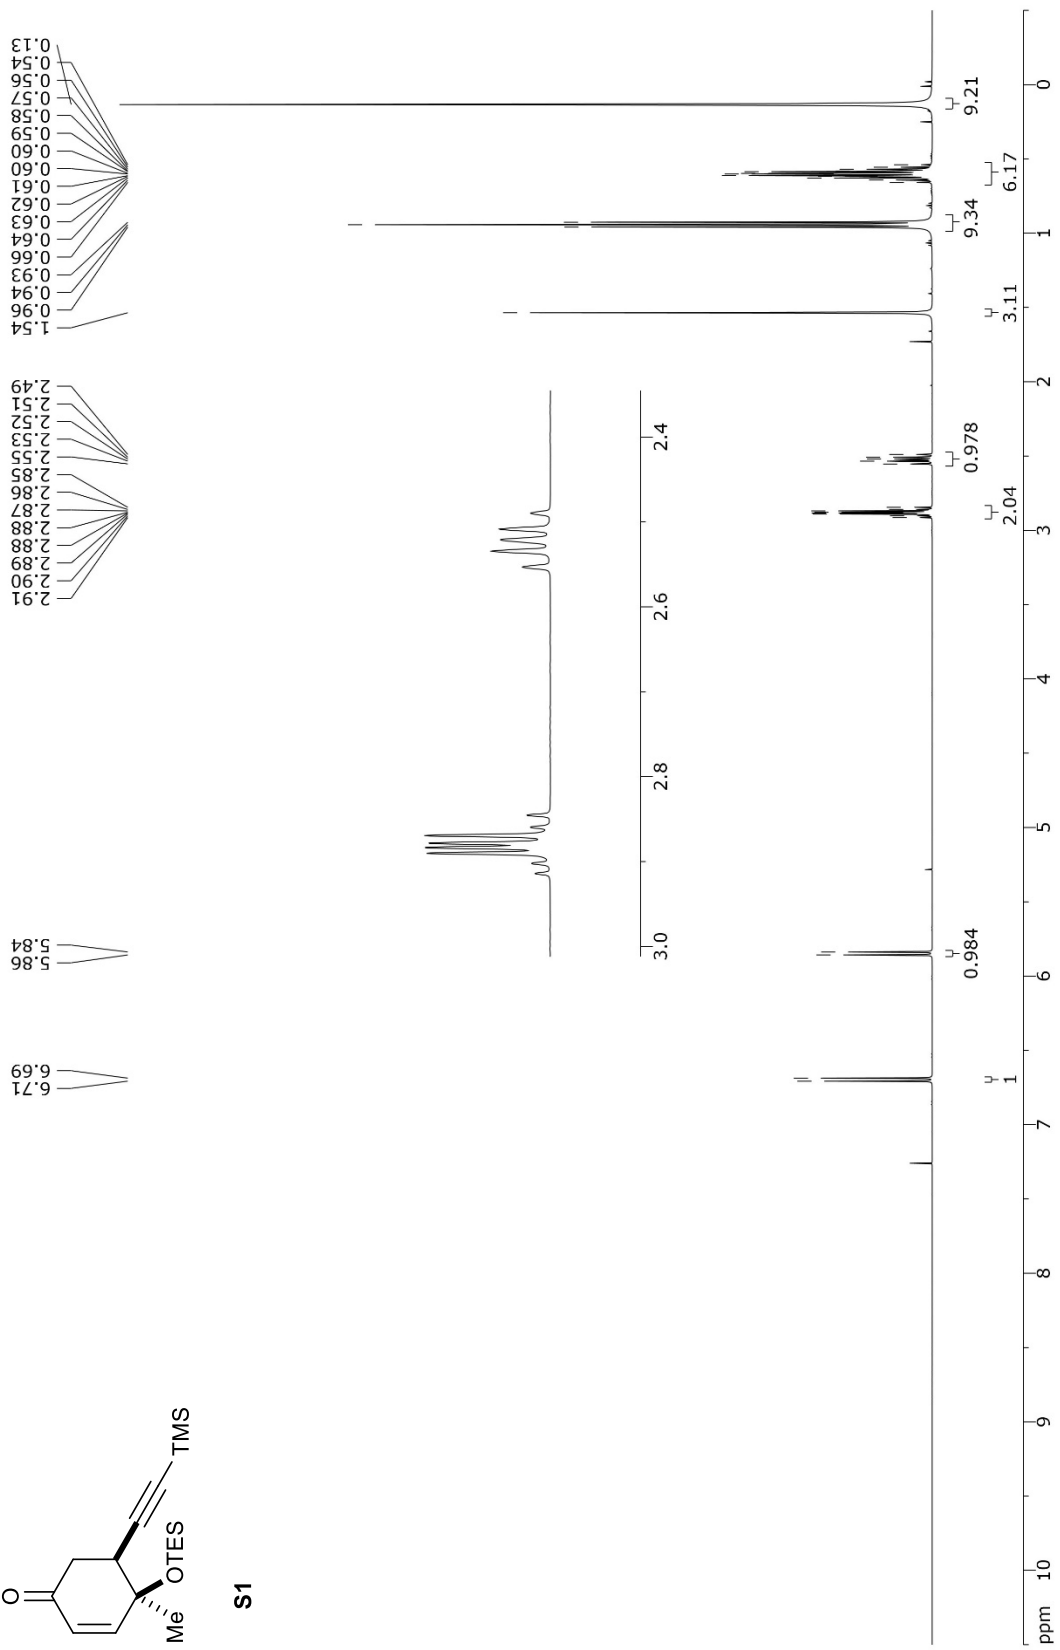

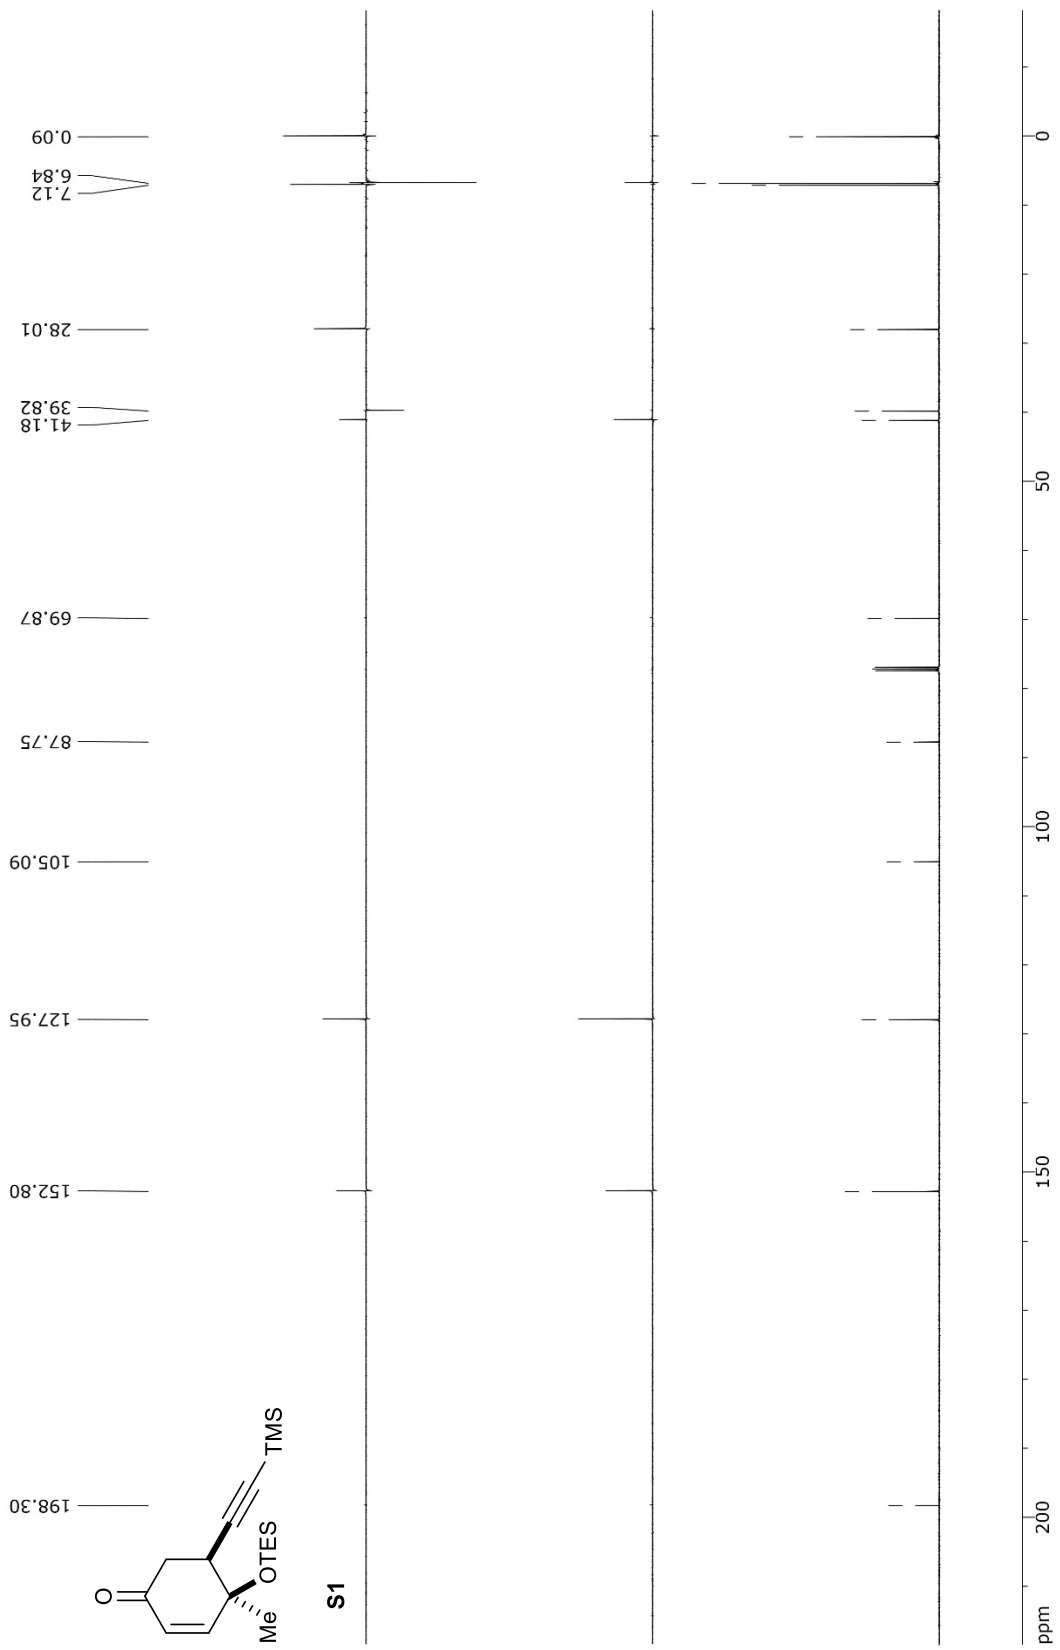

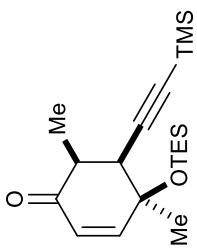

11

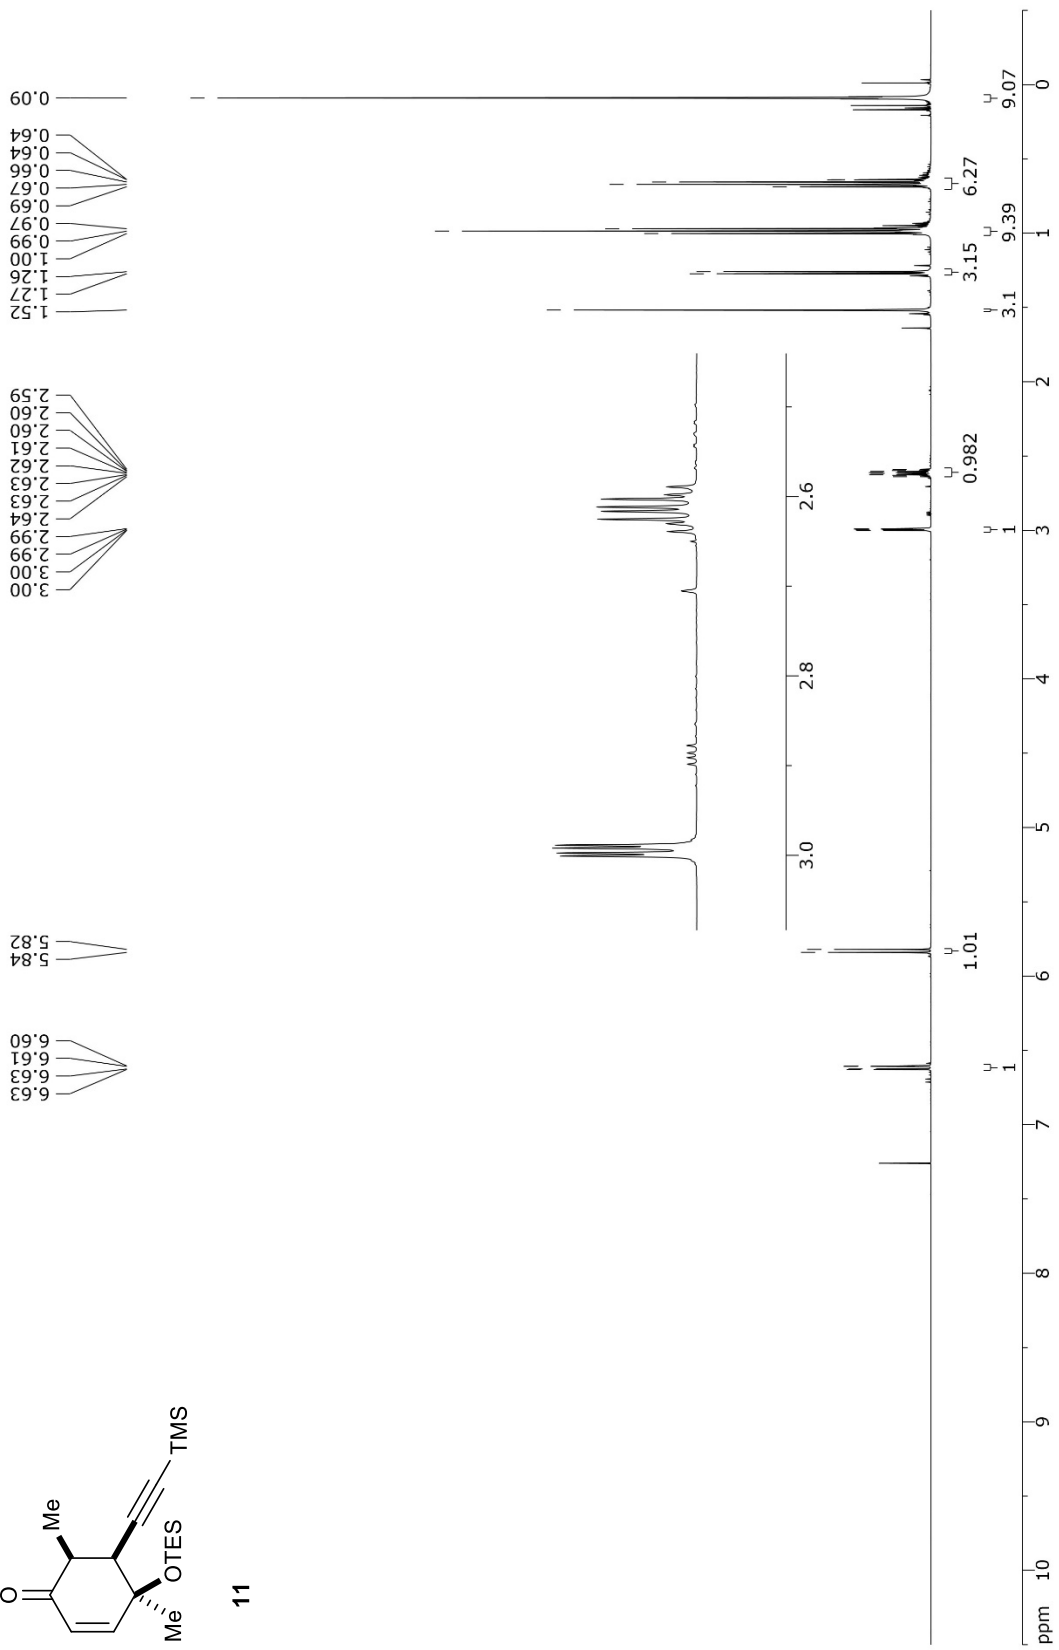



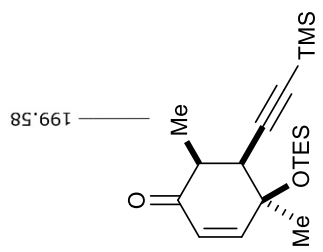

11

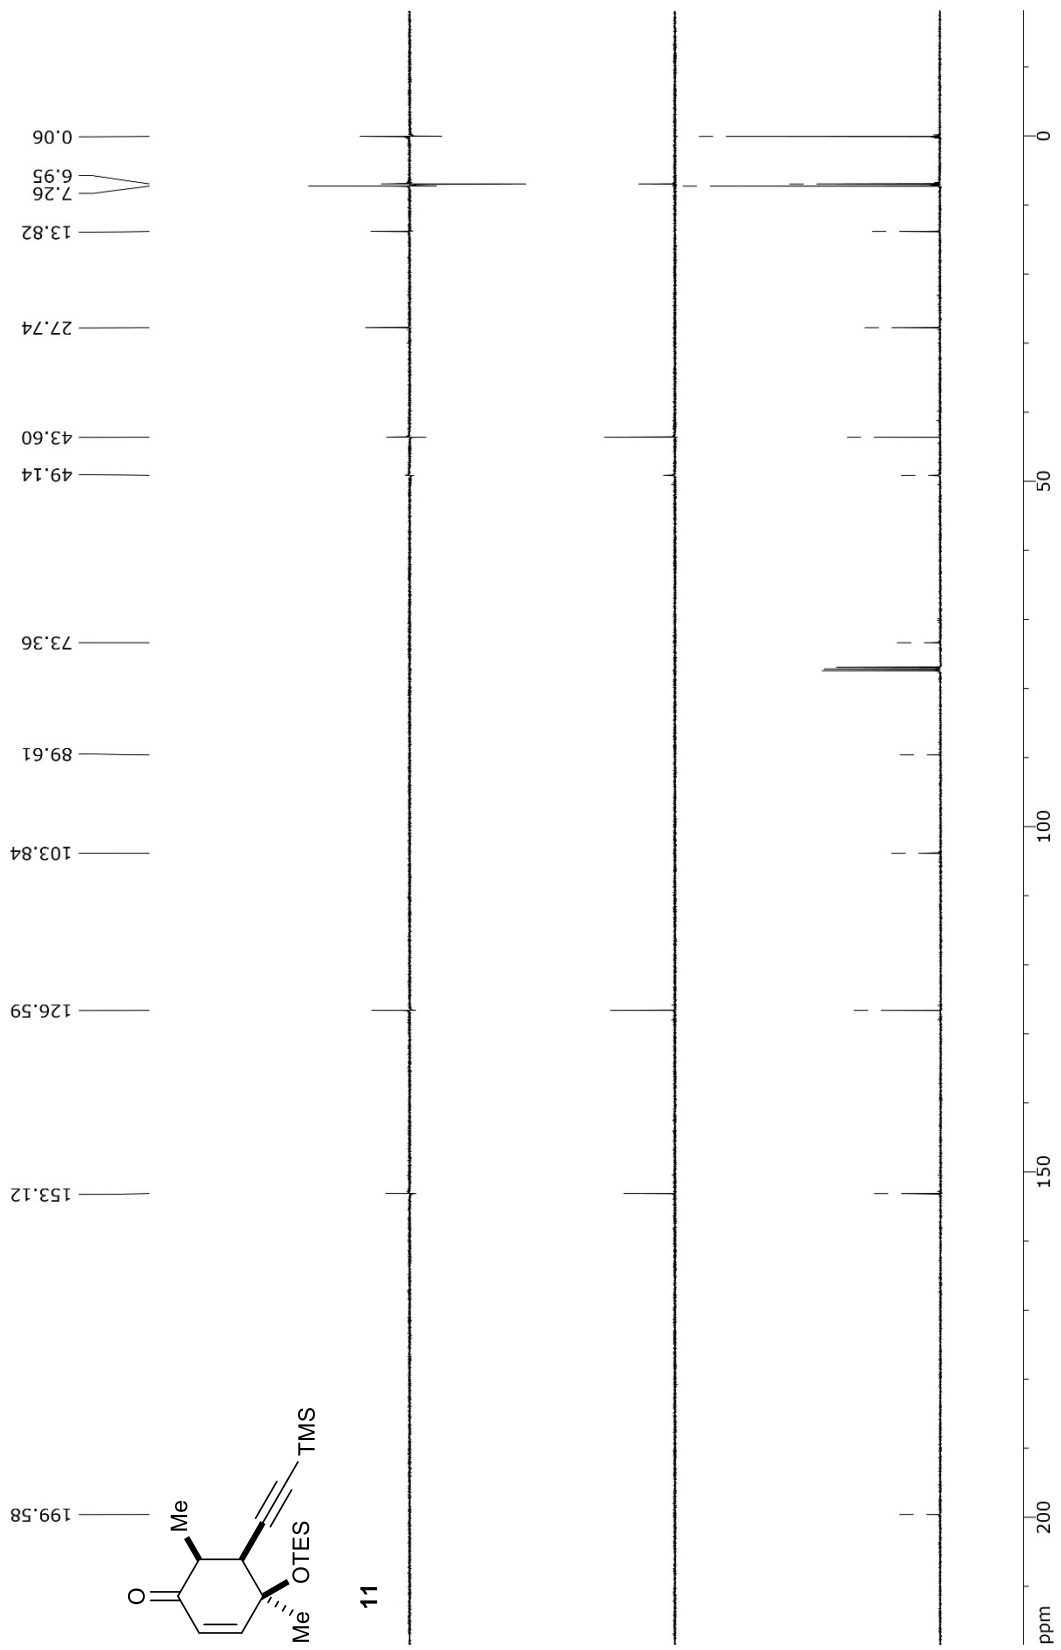

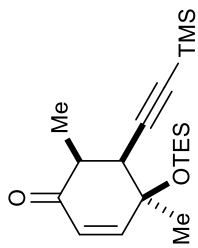

11  
NOE 3.02 ppm

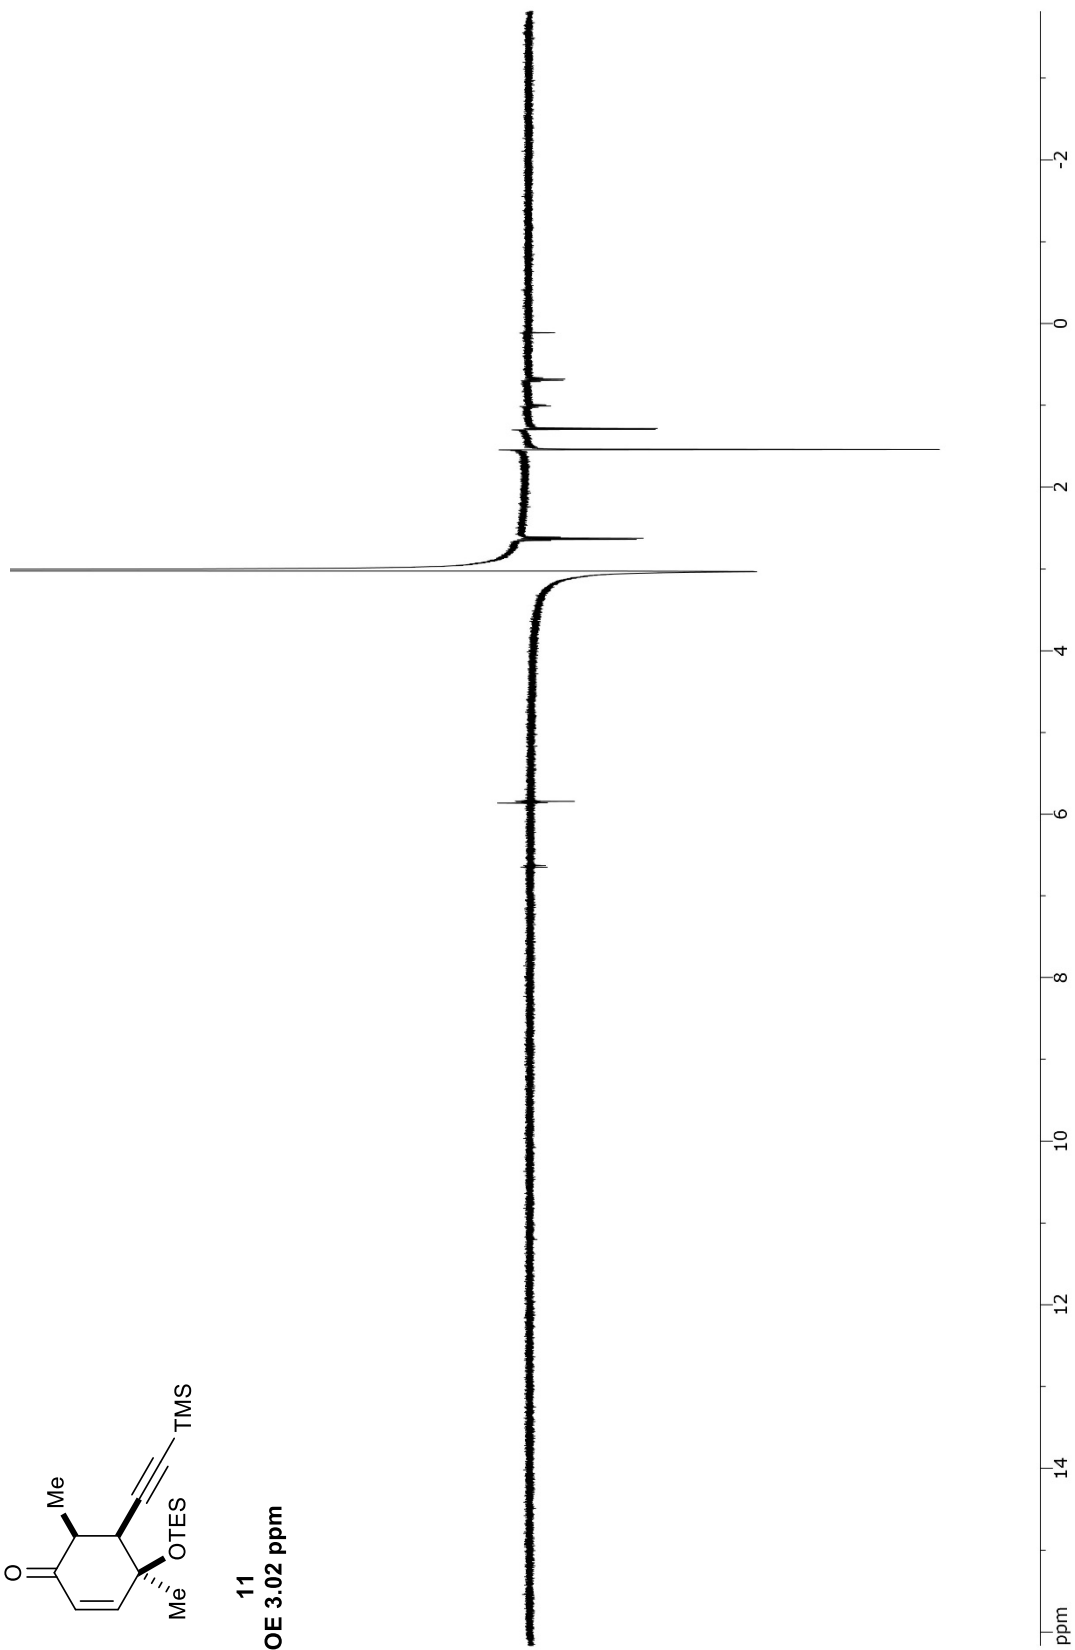

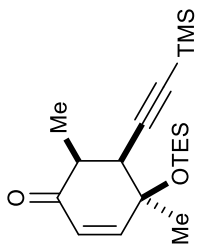

11  
NOE 2.63 ppm

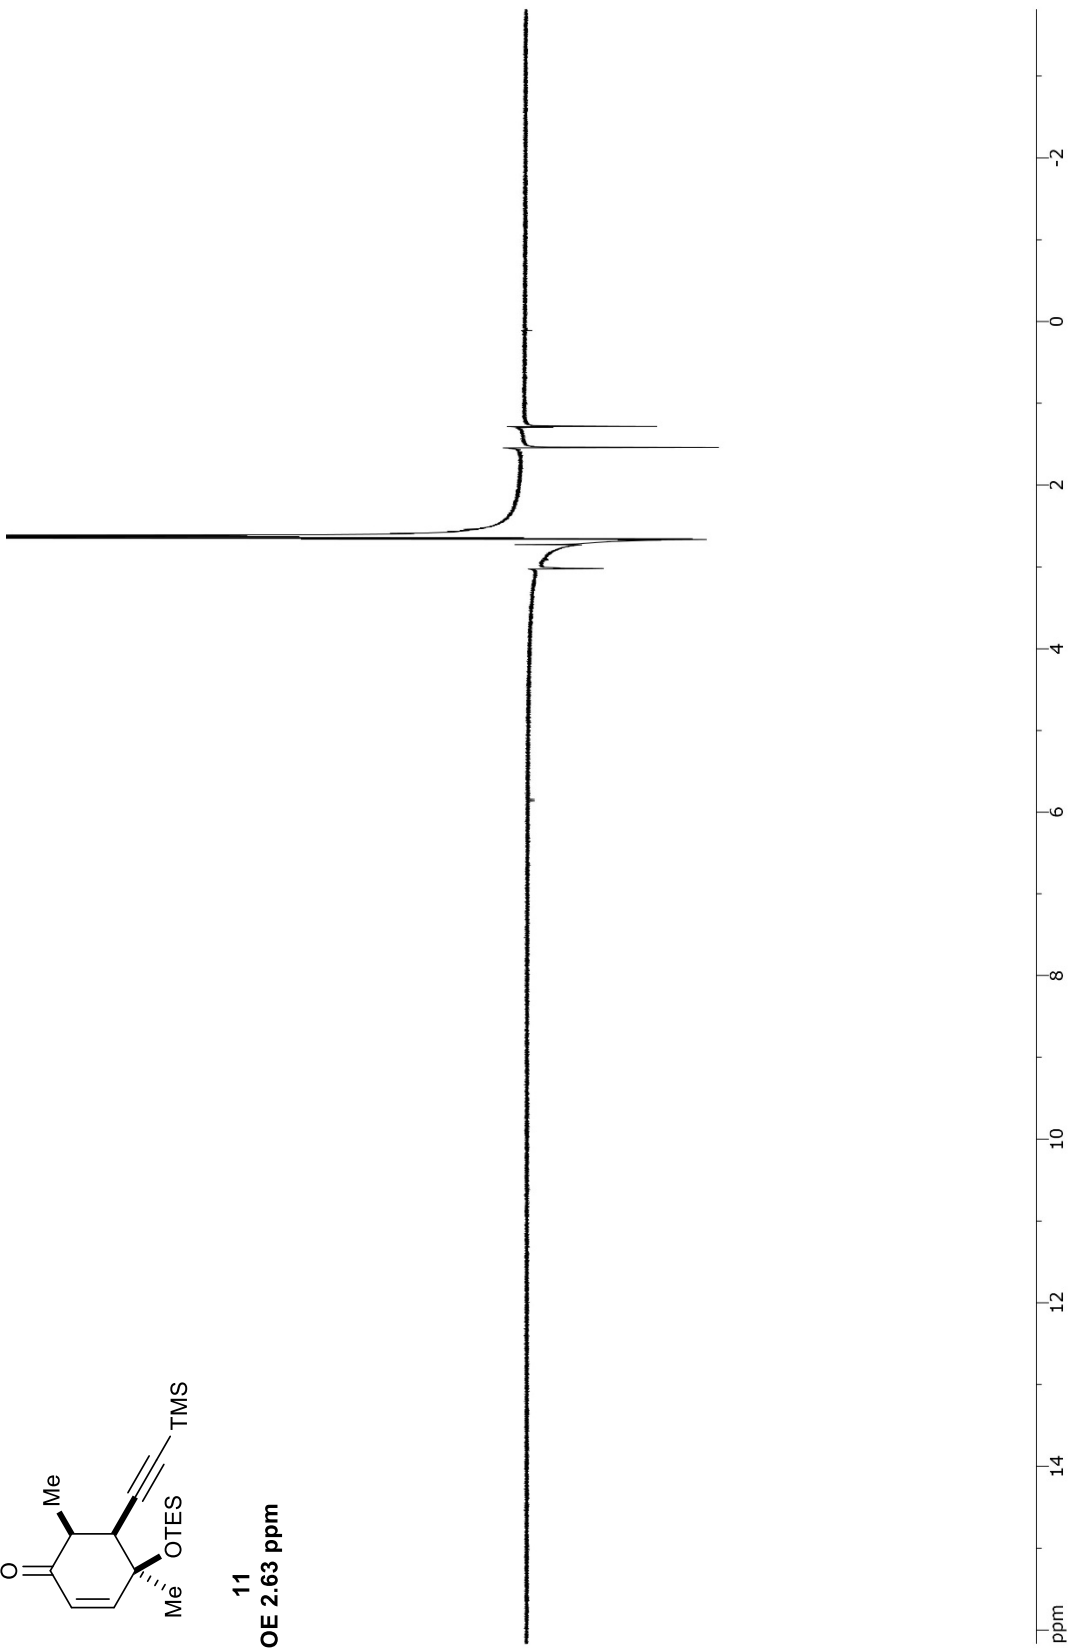

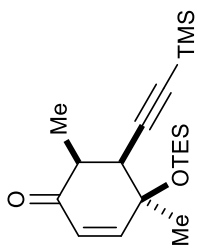

11  
NOE 1.29 ppm

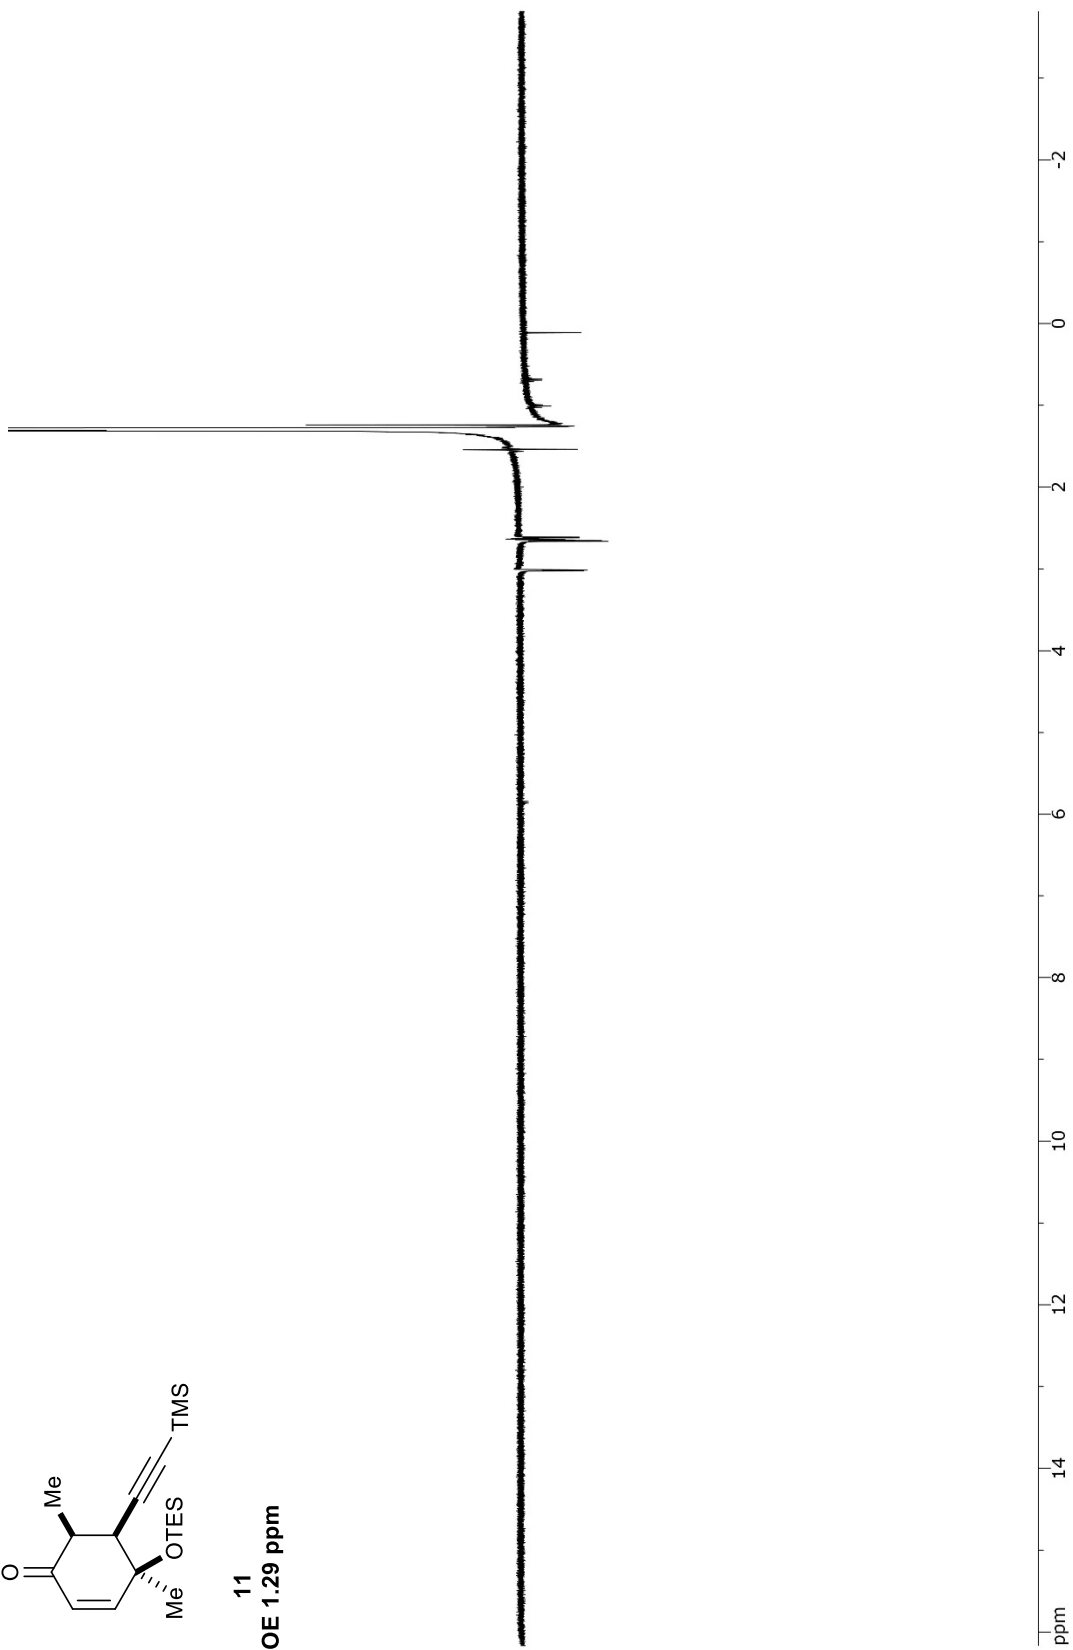

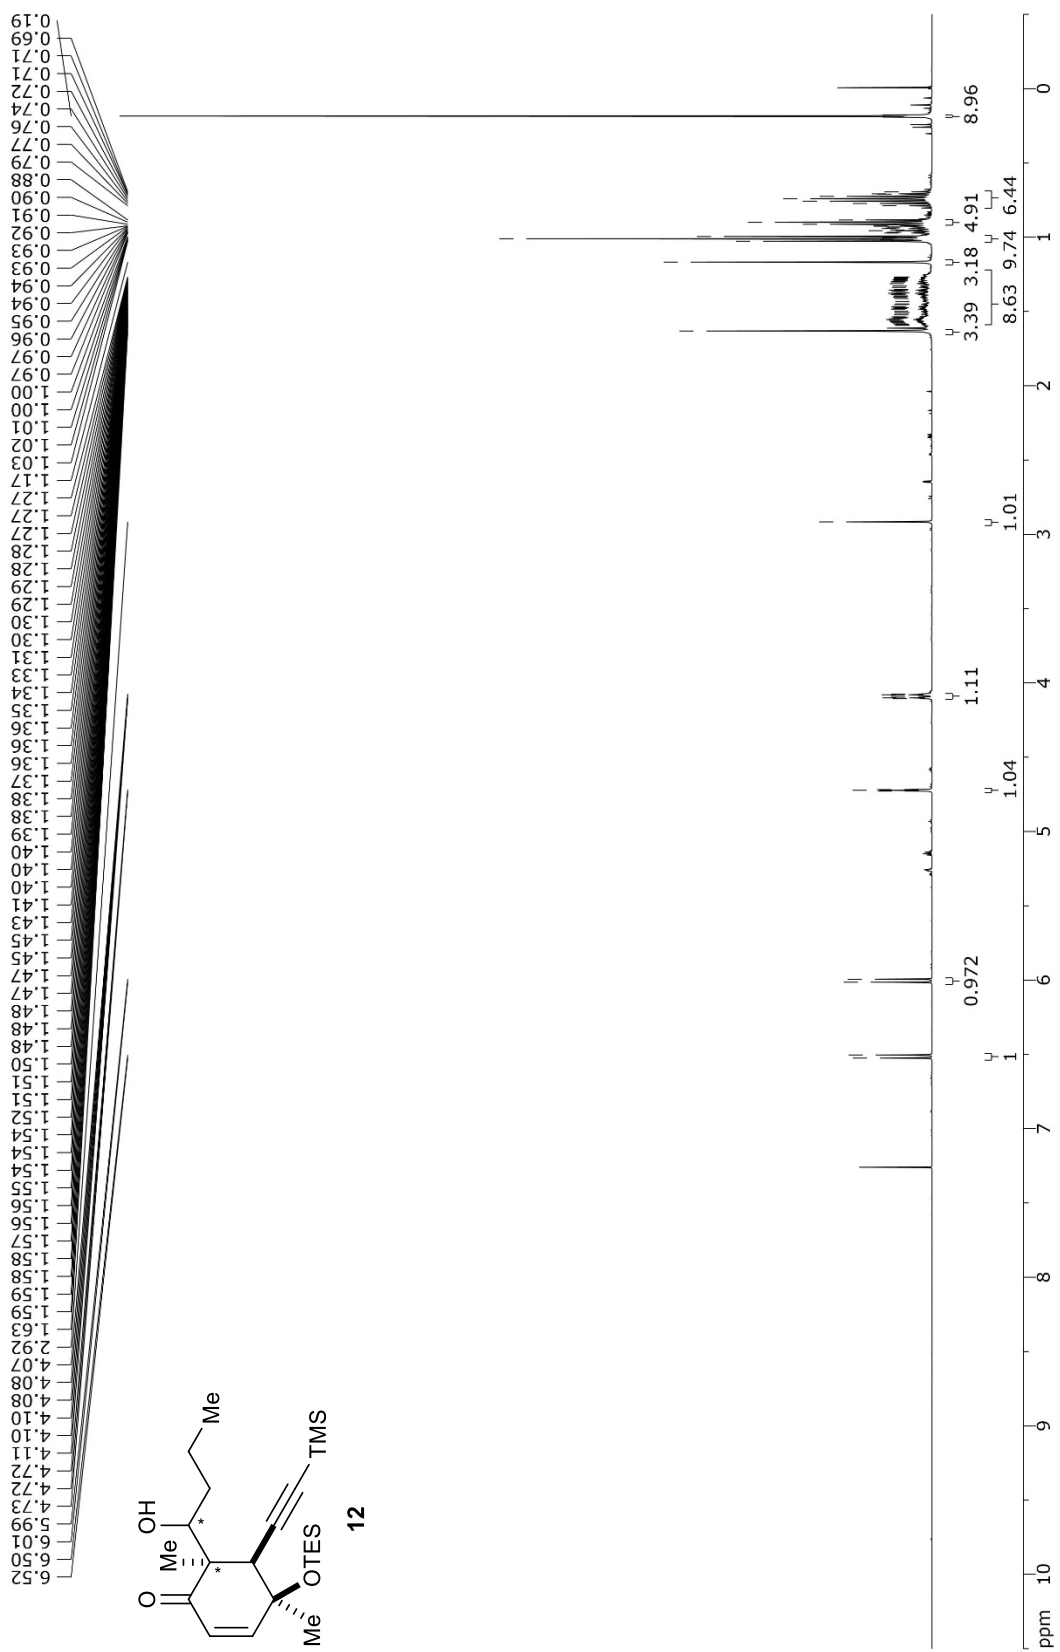

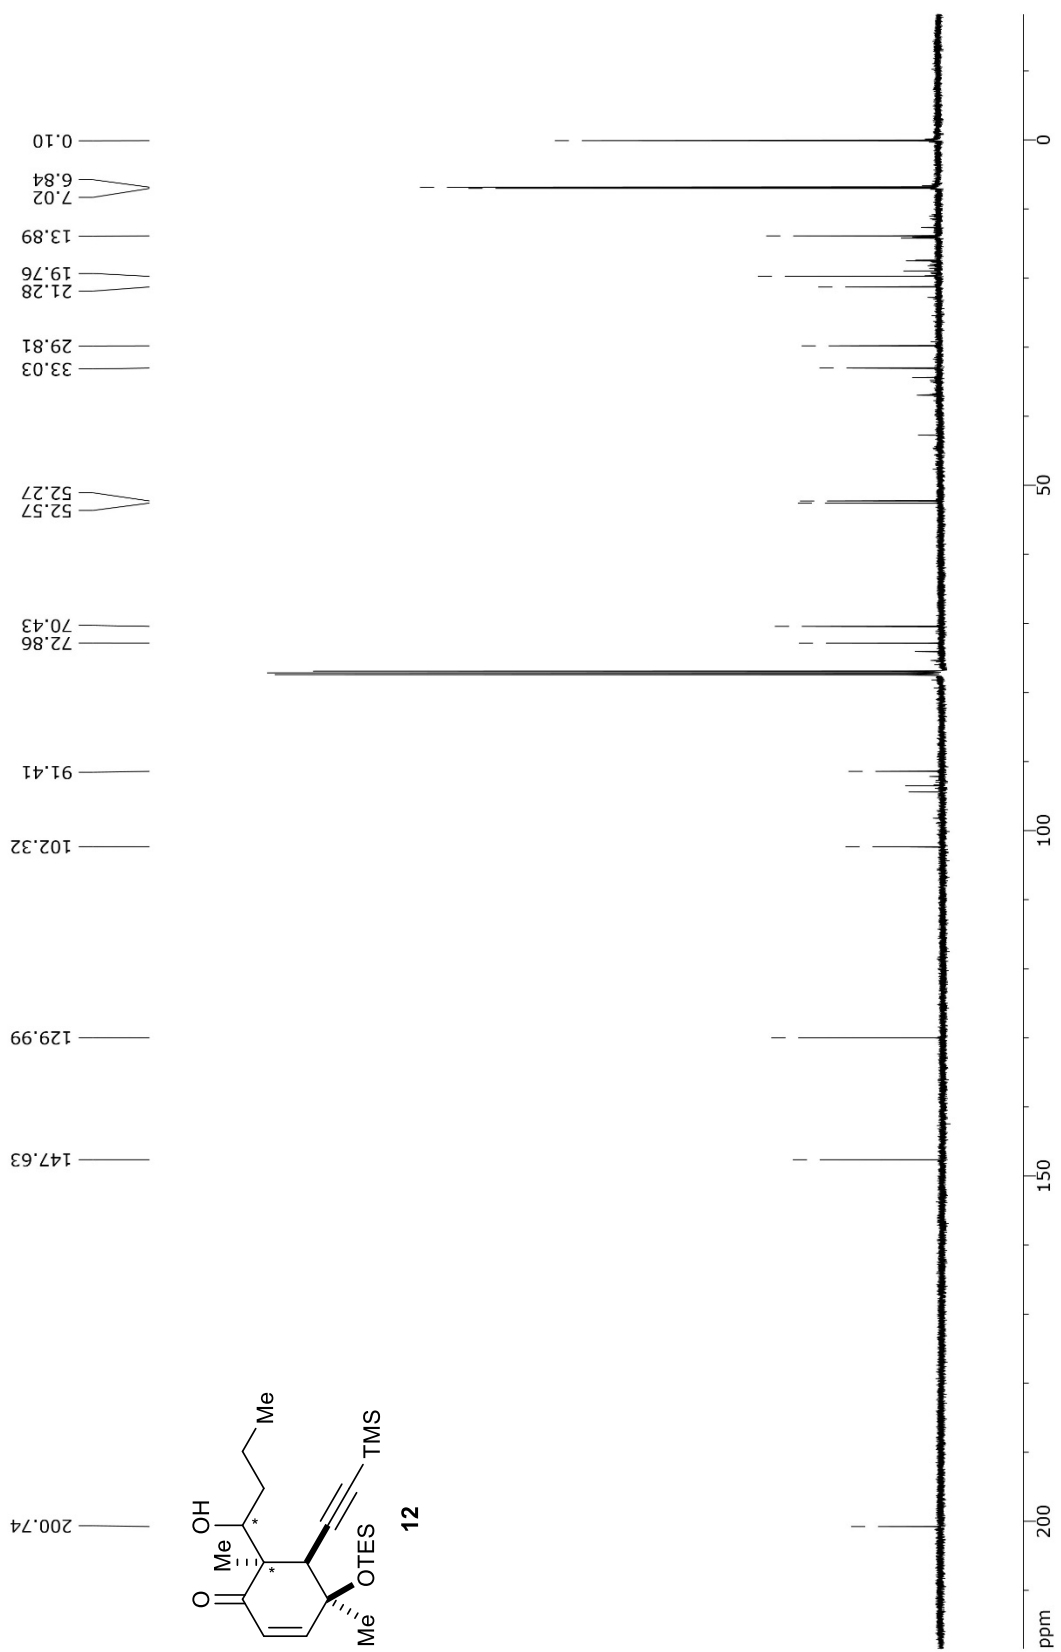

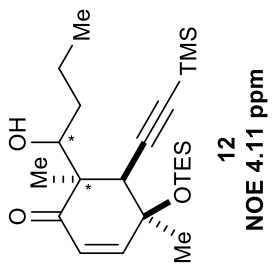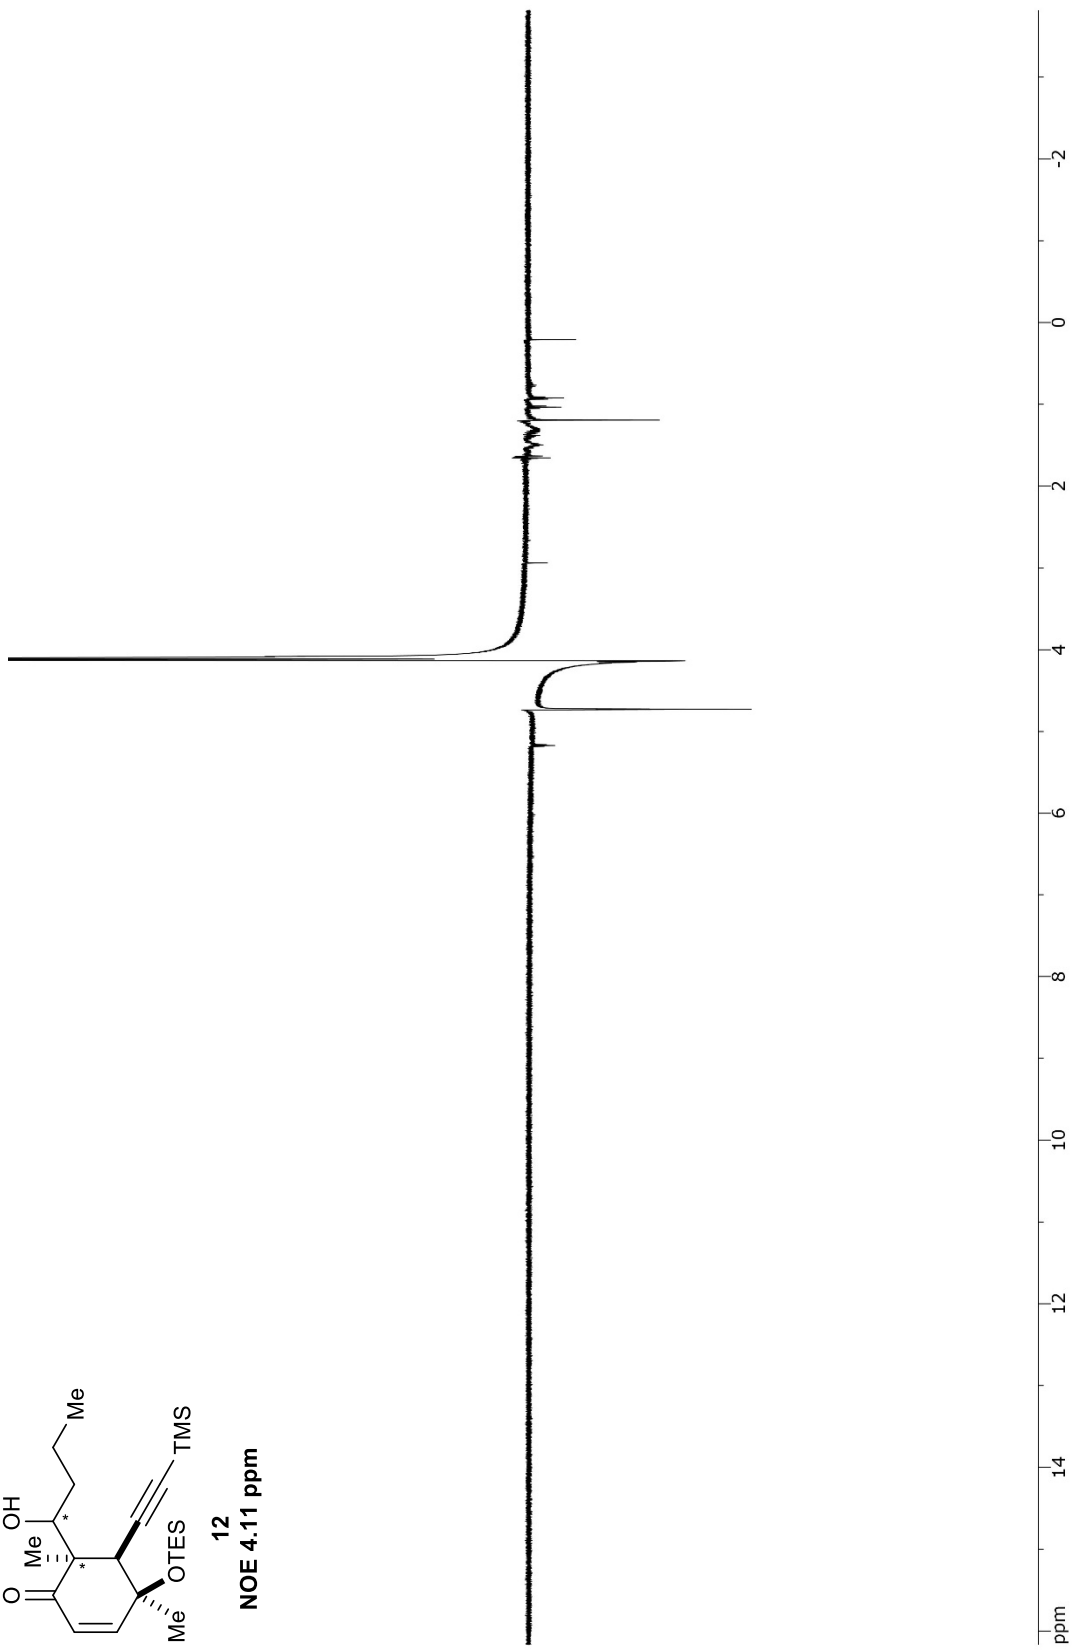

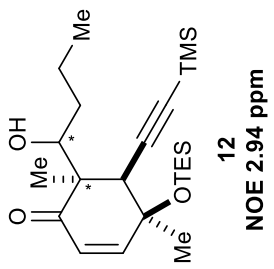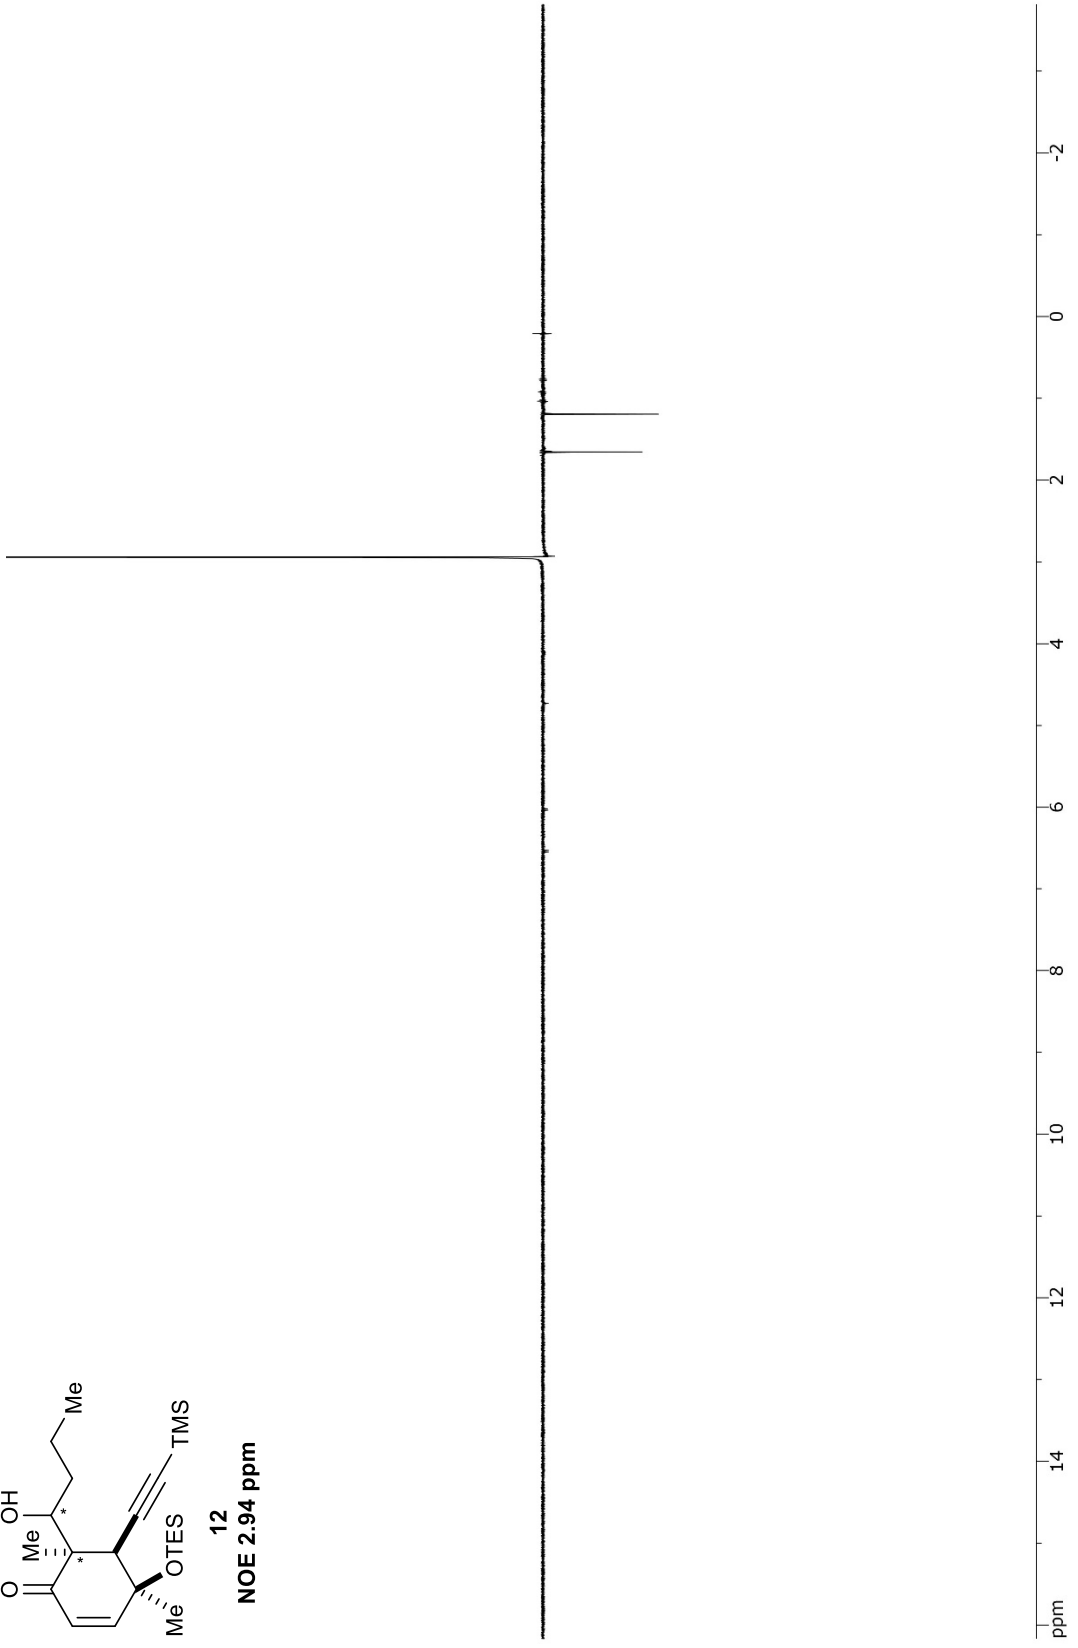



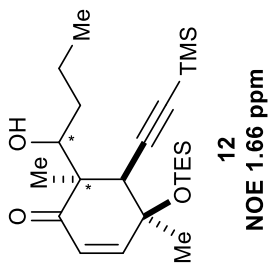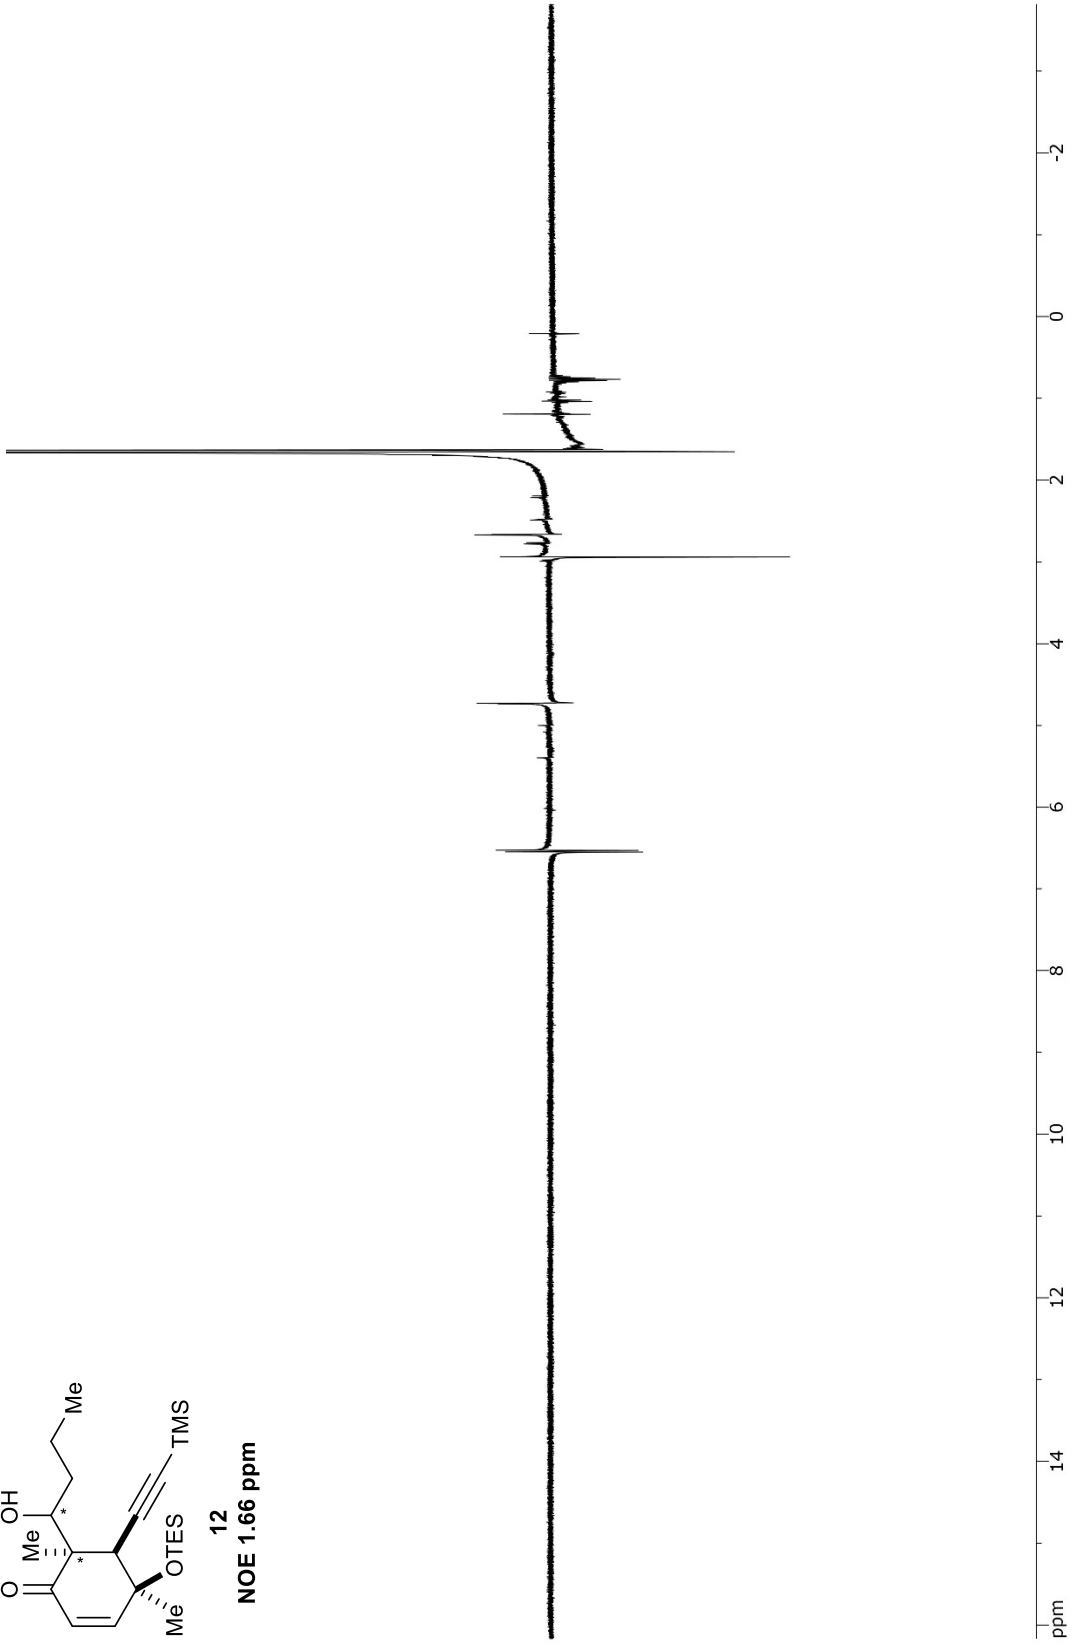

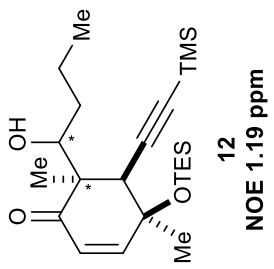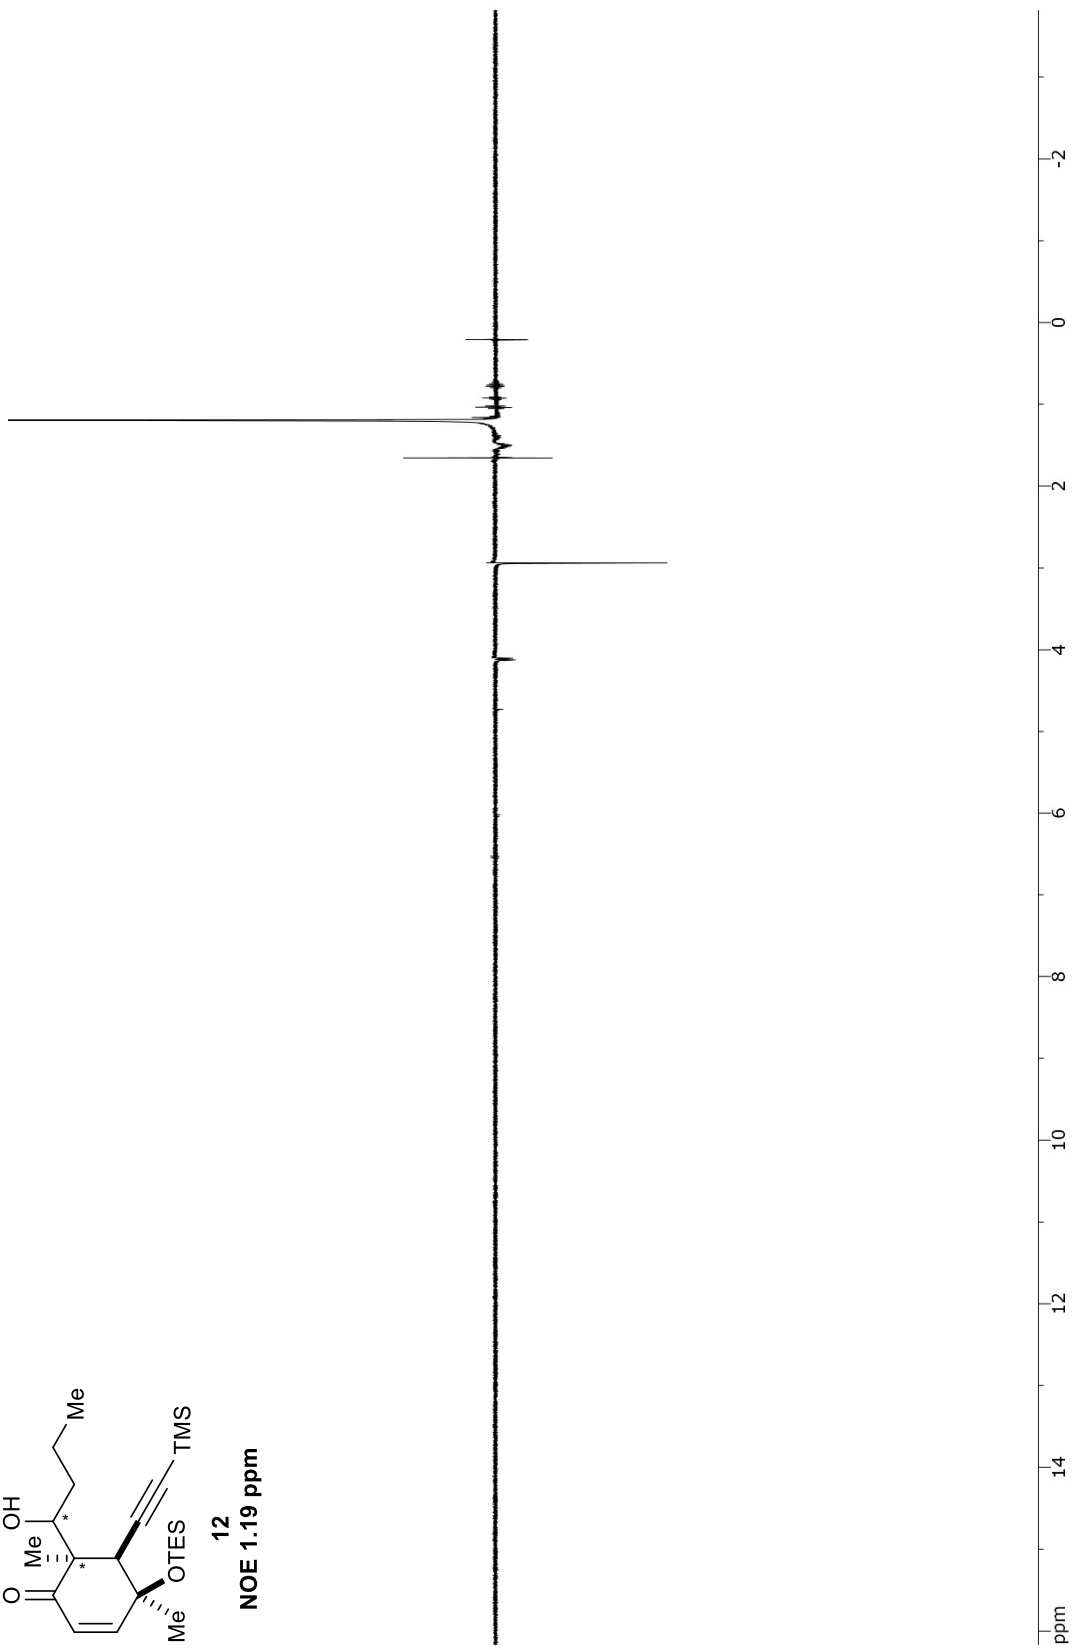

Supplement: c7ob00124j1.pdf [file c7ob00124j1.pdf]
